# Supplementary material
Source: Research Square preprint supplement (doi:10.21203/rs.3.rs-9121293/v1)
Supplement: Supplementary file 1 [file 3c29871439d5d101090a5850.docx]

**Supplementary Figures**


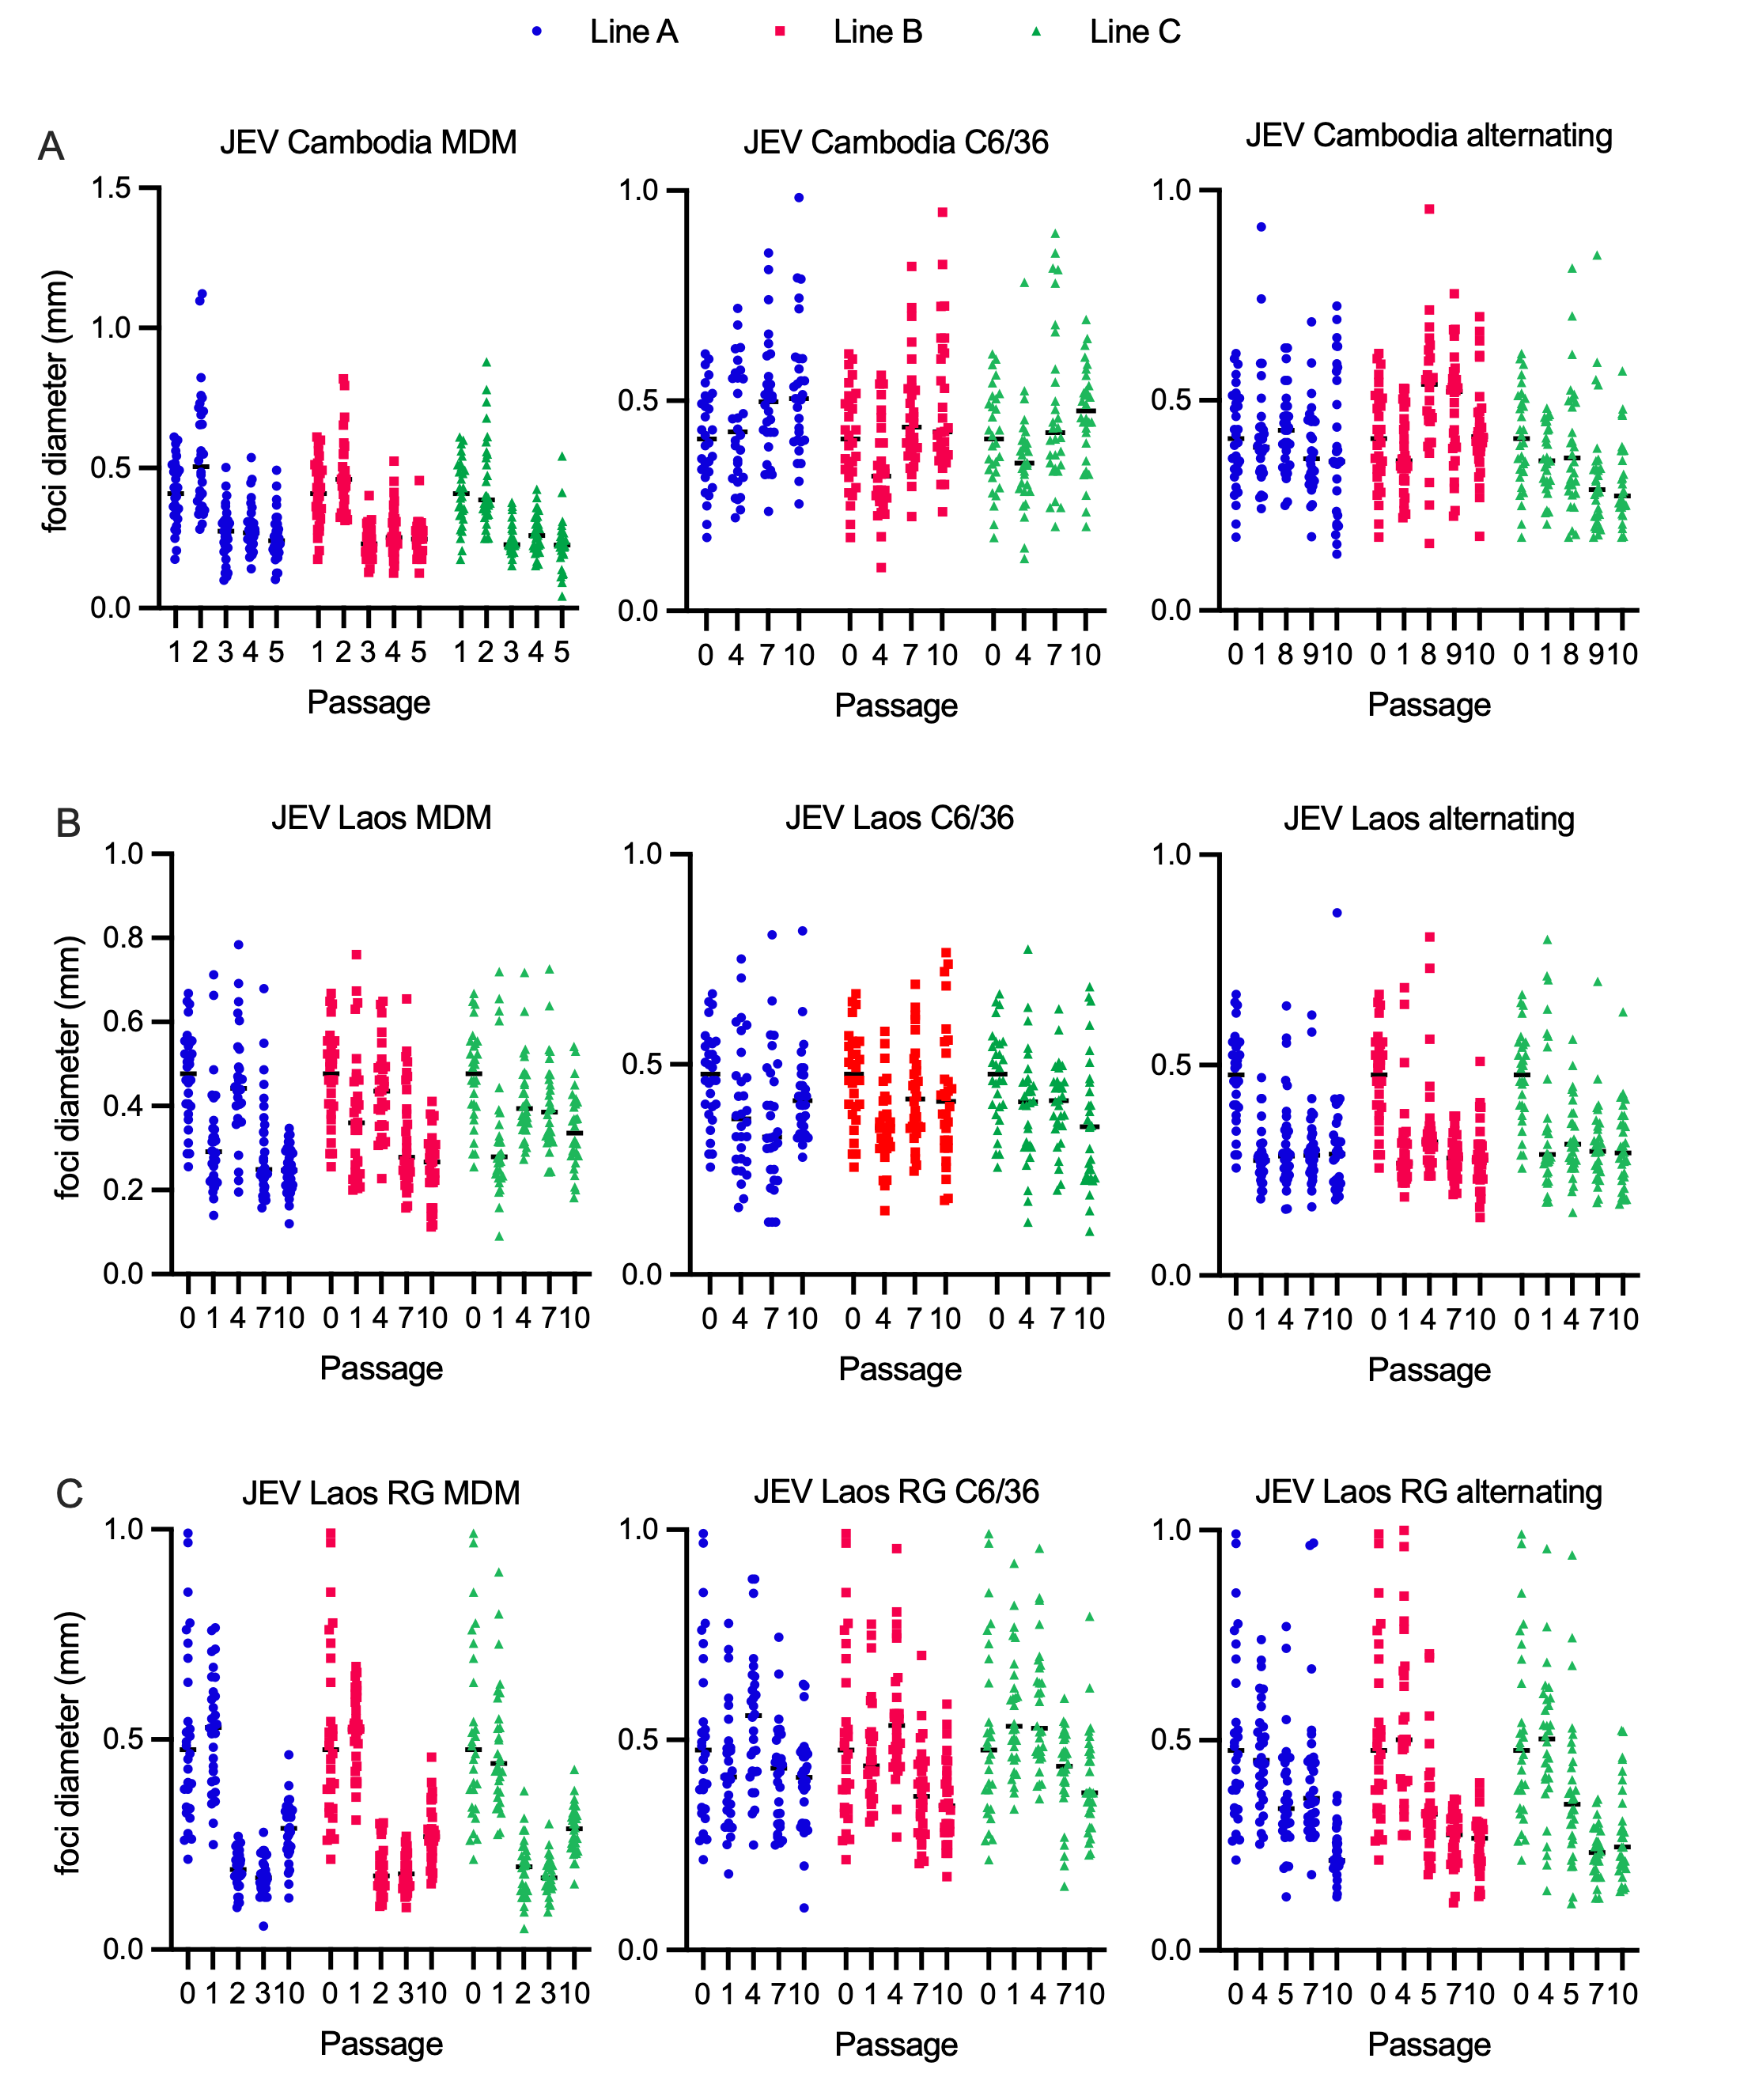


**Supplementary Figure 1. Changes in foci sizes in C6/36 cultures following passaging of JEV in MDM.** JEV Cambodia (A), JEV Laos (B) and JEV Laos RG (C) were passaged 10 times in MDM, C6/36, or in both cell types in an alternating manner (left to right). At the indicated passages the viruses were characterized by focus-forming assays. Line A is depicted in blue, line B in red and line C in green.


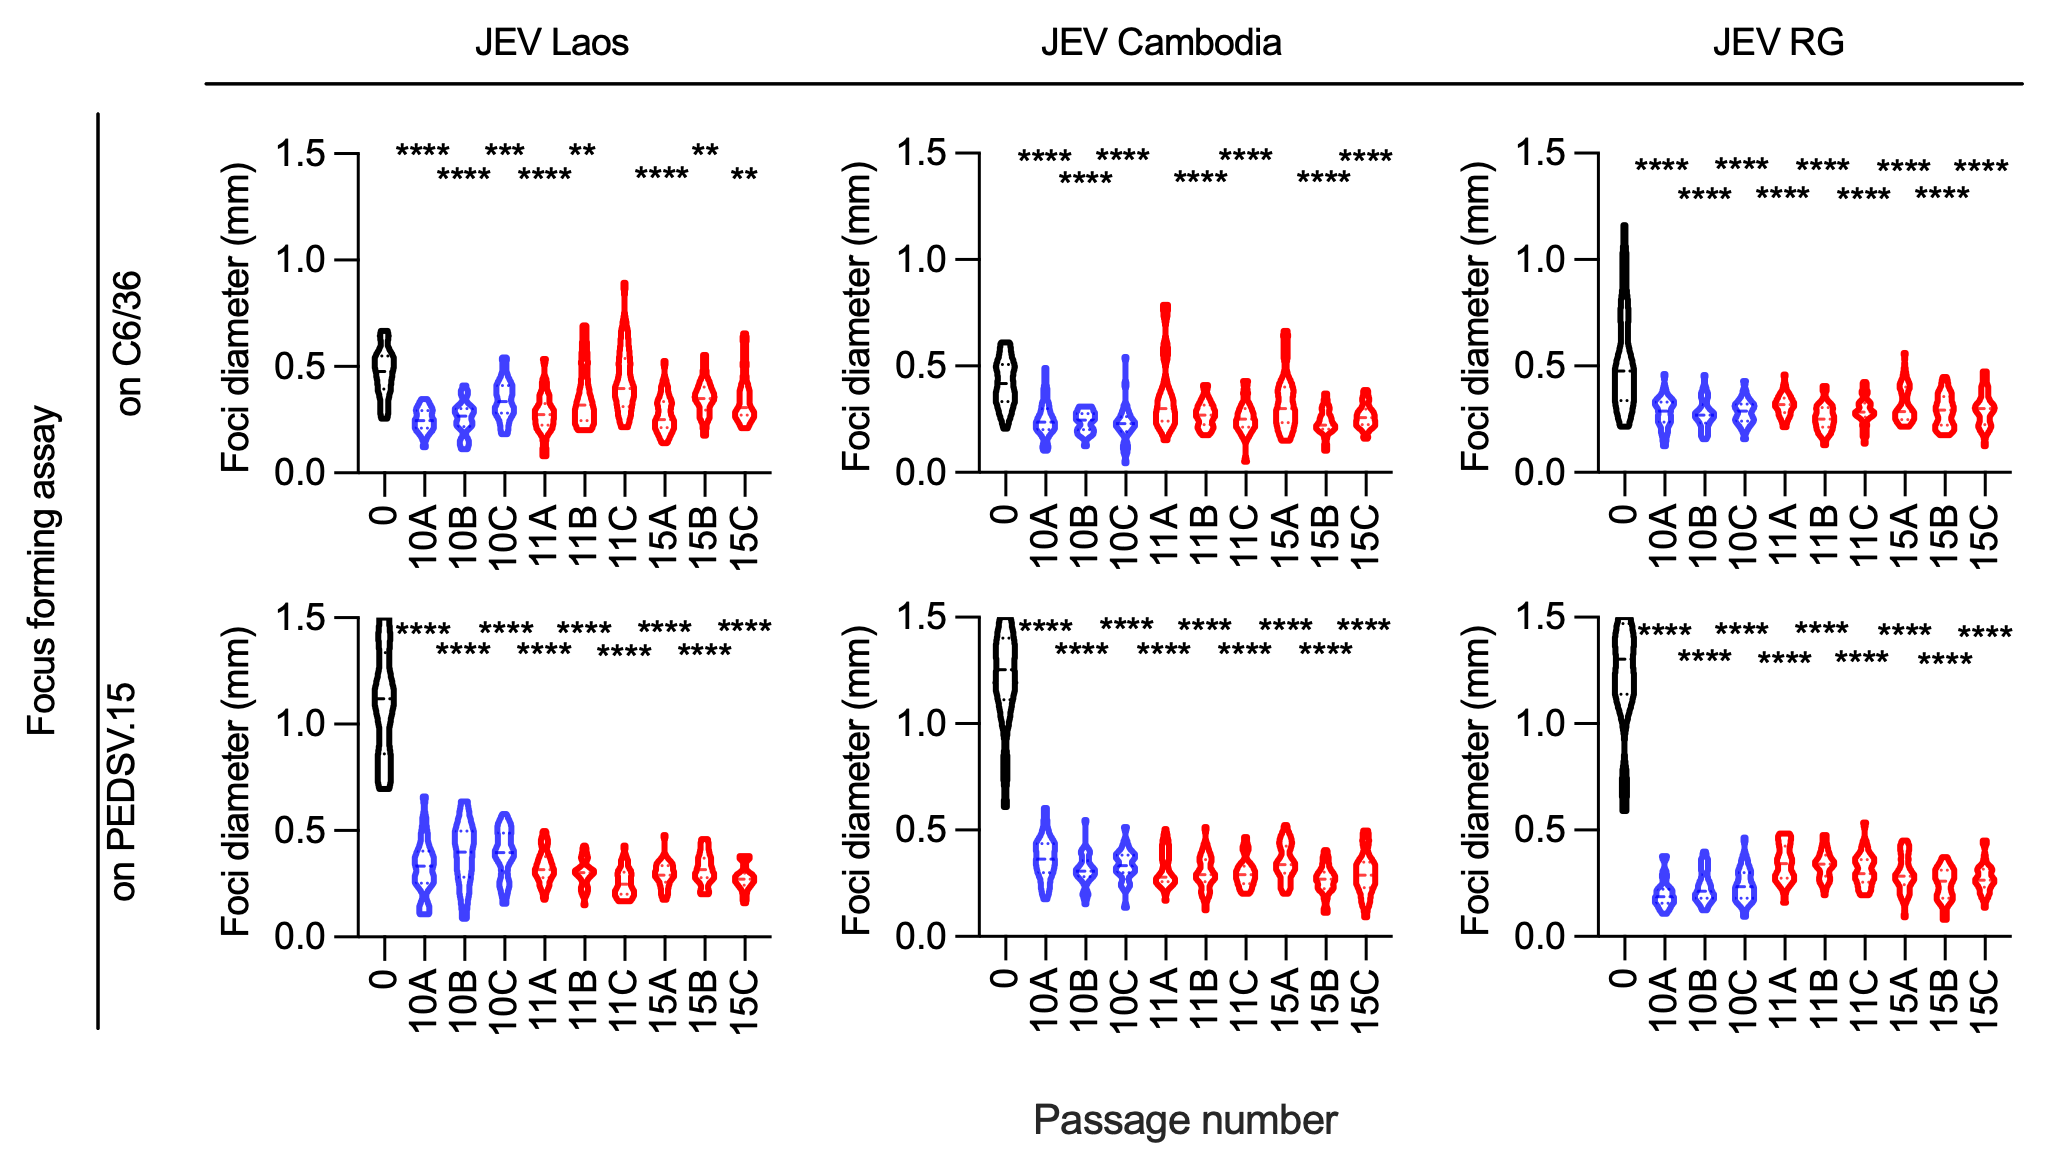


**Supplementary Figure 2.** **Stability of the small-foci size phenotype during reverse passaging in C6/36 cells**. P10-MDM JEV (blue) of JEV Cambodia, Laos and Laos RG were passaged an additional five times on insect C6/36 cells (red), and the P10, P11 and P15 viruses were compared in a focus forming assay using C6/36 and PEDSV.15 cells. All foci sizes were compared to P0 by the Tukey’s multiple comparison test (*p<0.05, **p<0.01, ***p<0.001 and ****p<0.0001).
