# Supplementary material
Source: Research Square preprint supplement (doi:10.21203/rs.3.rs-9121293/v1)
Supplement: Supplementary file 1 [file 232fb99a318f81f360f6fa33.xlsx]

## Sheet: PEDSV data
Virus	cell type	passage	line	foci sizes (mm)																														Foci size "median absolute deviation"	Foci size "mean"	Foci size "median"	Foci size >0.7 (percentages)	Foci size <0.6 (percentages)	Foci size significant difference to p0 (p<0.01: two-way Anoova, Dunnetts's correction)	Relative Infectivity
Cambodia		0	NA	1.50166	1.39967	1.28482	1.03088	1.18257	1.17729	1.11757	1.595	1.52389	0.998649	1.47593	1.16103	1.39164	1.43223	0.770891	1.40567	0.817557	1.34127	1.21709	1.36726	1.30645	1.78675	1.09931	1.06622	1.22525	1.18572	1.19827	0.60931	1.31524	1.30764	0.141053	1.24309	1.25503	93.3333	0		0.779801
Cambodia	MDM	1	A	1.09476	1.08361	0.984828	1.39276	1.44069	1.92682	1.31879	1.33941	1.71924	1.2882	1.38446	0.94842	0.866382	1.39433	1.39522	1.55645	1.55185	1.07321	1.60841	1.39879	1.00456	1.14047	0.760308	1.33055	1.58834	1.50166	1.38379	0.798669	0.658921	0.796323	0.230844	1.25767	1.33498	86.6667	0	ns	0.817988
Cambodia	MDM	2	A	1.53063	1.48916	1.05919	0.904375	1.18572	1.21709	1.40567	1.31997	1.23991	1.34312	1.28845	0.956594	1.20216	1.75438	1.27312	1.52573	1.37067	1.65254	1.6353	1.42874	1.51343	1.31713	1.38063	1.30382	1.28845	1.25984	1.57949	1.60376	0.426489	0.324459	0.124608	1.29267	1.31855	93.3333	6.89655	ns	0.950011
Cambodia	MDM	3	A	0.894684	0.380972	0.554164	0.449944	0.224626	0.249584	0.190077	0.315699	0.199667	0.268808	0.844537	0.39463	0.213245	0.223234	0.055807	0.141184	0.190077	0.223234	0.245809	0.167427	0.406292	0.292132	0.205813	0.678027	0.254526	0.205813	0.181697	0.223234	0.399335	0.224626	0.0493303	0.31663	0.235218	6.66667	93.1034	<0.0001	1.20383
Cambodia	MDM	4	A	0.409349	0.236774	0.399335	0.352968	0.301573	0.339472	0.32542	0.245809	0.167427	0.214699	0.436591	0.282373	0.167427	0.387461	0.226011	0.159809	0.201221	0.181697	0.102904	0.235458	0.347633	0.512103	0.319624	0.354728	0.371032	0.39463	0.265314	0.194932	0.335778	0.458854	0.0804472	0.297614	0.310598	0	100	<0.0001	1.42149
Cambodia	MDM	7	A	0.341132	0.12848	0.441296	0.341132	0.399385	0.310857	0.187706	0.292993	0.375724	0.198981	0.368505	0.194932	0.339472	0.534135	0.449944	0.194932	0.176481	0.179975	0.484605	0.274543	0.388259	0.319624	0.470915	0.352968	0.254526	0.279041	0.564747	0.308717	0.151816	0.226011	0.0866868	0.317728	0.31524	0	100	<0.0001	1.36861
Cambodia	MDM	10	A	0.413137	0.480088	0.346735	0.436591	0.230104	0.424293	0.214699	0.265314	0.32542	0.359957	0.402442	0.446469	0.32542	0.381789	0.426489	0.368505	0.354728	0.444372	0.300537	0.235458	0.39463	0.603663	0.300537	0.346735	0.43588	0.539932	0.494152	0.300537	0.292132	0.176481	0.0636939	0.368908	0.364231	0	96.5517	<0.0001	1.14526
Cambodia	MDM	1	B	1.5355	0.838615	0.656556	1.25017	1.31713	0.765618	1.13937	1.54984	1.08361	1.44004	0.870687	1.27386	1.16023	1.22322	1.06622	1.74869	1.24792	1.54359	1.28166	1.59285	1.1907	1.74869	0.916348	0.94973	1.11617	1.32303	1.54359	1.94692	1.02694	2.00244	0.25428	1.27833	1.24904	93.3333	0	0.0002	0.943835
Cambodia	MDM	2	B	1.33778	1.07437	1.70906	1.59207	1.31524	1.49293	1.39276	1.53245	1.45531	1.15377	1.48161	1.41912	1.6374	1.595	1.54359	1.0533	1.21453	1.52001	1.86271	1.20008	1.01351	1.21914	1.27116	1.13828	1.02785	1.42263	0.446469	0.964056	1.61306	1.55945	0.187931	1.34196	1.40594	96.6667	3.44828	<0.0001	0.856762
Cambodia	MDM	3	B	0.374376	0.282373	0.224626	0.32542	0.380154	0.403216	0.254526	0.194932	0.274543	0.213245	0.387461	0.332989	0.211778	0.226011	0.249584	0.32542	0.304655	0.274543	0.141184	0.315699	0.28457	0.430851	0.436591	0.300537	0.339472	0.213245	0.211778	0.299501	0.268808	0.269969	0.052759	0.291735	0.283471	0	100	<0.0001	1.09441
Cambodia	MDM	4	B	0.423557	0.374376	0.334855	0.346735	0.201221	0.354728	0.324459	0.181697	0.15785	0.214699	0.43588	0.28457	0.335778	0.346735	0.249584	0.134407	0.124792	0.230104	0.374376	0.317671	0.363401	0.375206	0.260572	0.436591	0.102904	0.249584	0.201221	0.312729	0.230104	0.213245	0.0721361	0.283121	0.298649	0	100	<0.0001	1.22768
Cambodia	MDM	7	B	0.449944	0.444372	0.368505	0.312729	0.430851	0.368505	0.476831	0.380972	0.256966	0.32542	0.291065	0.425029	0.352968	0.312729	0.265314	0.254526	0.426489	0.236774	0.371032	0.269969	0.235458	0.315699	0.332989	0.334855	0.291065	0.245809	0.247076	0.446469	0.390662	0.312729	0.0603463	0.339127	0.329205	0	100	<0.0001	1.12516
Cambodia	MDM	10	B	0.547382	0.339472	0.324459	0.282373	0.402442	0.32542	0.357348	0.151816	0.312729	0.304655	0.324459	0.303632	0.357348	0.291065	0.256966	0.301573	0.28457	0.279041	0.39463	0.265314	0.380154	0.300537	0.190077	0.39463	0.199667	0.308717	0.402442	0.319624	0.28457	0.205813	0.0302153	0.313098	0.306686	0	100	<0.0001	1.28588
Cambodia	MDM	1	C	1.63378	1.09391	1.58501	1.59753	1.31784	0.781323	1.14917	1.20759	1.39164	1.25315	1.54762	1.53773	1.27312	1.28845	1.31358	1.40323	1.39433	1.52267	1.34336	1.49605	1.0381	0.973378	1.6828	1.2836	1.31784	1.00611	0.886286	1.04229	1.56205	0.870687	0.21438	1.29314	1.31571	96.6667	0	0.6452	0.999125
Cambodia	MDM	2	C	1.67668	0.388259	1.91774	1.55665	0.528856	1.12562	0.964375	0.424293	1.4536	0.505371	1.54279	1.39967	1.6223	1.57317	1.17729	1.51816	0.446469	1.05565	1.48161	1.405	1.57258	0.623961	1.63149	1.26305	0.484605	1.22398	0.375206	1.06826	1.70888	1.7234	0.283322	1.1813	1.33136	73.3333	24.1379	<0.0001	0.954744
Cambodia	MDM	3	C	0.80836	0.299501	0.317671	0.303632	0.324459	0.446469	0.339472	0.224626	0.224626	0.245809	0.449252	0.529449	0.268808	0.359957	0.423557	0.375206	0.279041	0.363401	0.334855	0.245809	0.317671	0.324459	0.274543	0.403216	0.368505	0.43588	0.47421	0.279041	0.413137	0.245809	0.0579815	0.356681	0.329657	3.33333	100	<0.0001	1.19136
Cambodia	MDM	4	C	0.51453	0.371032	0.319624	0.303632	0.151816	0.279041	0.339472	0.256966	0.304655	0.15785	0.400115	0.319624	0.265314	0.303632	0.211778	0.249584	0.291065	0.226011	0.371032	0.179975	0.339472	0.429403	0.300537	0.194932	0.269969	0.179975	0.235458	0.199667	0.43588	0.409349	0.0650666	0.293713	0.295801	0	100	<0.0001	1.14174
Cambodia	MDM	7	C	0.28573	0.425853	0.295907	0.295907	0.242303	0.307263	0.27624	0.336015	0.253378	0.234216	0.291065	0.335778	0.145533	0.194932	0.352968	0.292132	0.194932	0.230104	0.354728	0.194932	0.247076	0.371032	0.194932	0.400115	0.374376	0.334855	0.249584	0.291065	0.375206	0.359957	0.0533393	0.29127	0.291599	0	100	<0.0001	1.18201
Cambodia	MDM	10	C	0.51453	0.32542	0.249584	0.250832	0.374376	0.388259	0.319624	0.339472	0.134407	0.328278	0.235458	0.406292	0.39463	0.312729	0.442263	0.371032	0.368505	0.319624	0.301573	0.424293	0.371032	0.304655	0.300537	0.235458	0.304655	0.282373	0.346735	0.39463	0.371032	0.380154	0.0388291	0.336415	0.333875	0	100	<0.0001	1.28588
Cambodia		0	NA	1.50166	1.39967	1.28482	1.03088	1.18257	1.17729	1.11757	1.595	1.52389	0.998649	1.47593	1.16103	1.39164	1.43223	0.770891	1.40567	0.817557	1.34127	1.21709	1.36726	1.30645	1.78675	1.09931	1.06622	1.22525	1.18572	1.19827	0.60931	1.31524	1.30764	0.141053	1.24309	1.25503	93.3333	0		0.779801
Cambodia	C6/36	1	A	1.09476	1.08361	0.984828	1.39276	1.44069	1.92682	1.31879	1.33941	1.71924	1.2882	1.38446	0.94842	0.866382	1.39433	1.39522	1.55645	1.55185	1.07321	1.60841	1.39879	1.00456	1.14047	0.760308	1.33055	1.58834	1.50166	1.38379	0.798669	0.658921	0.796323	0.230844	1.25767	1.33498	86.6667	0	ns	0.878431
Cambodia	C6/36	4	A	1.4507	0.506756	1.25751	1.58777	1.55998	1.19191	1.59794	1.25682	1.10067	1.11592	1.34868	1.32937	1.31025	1.12756	1.3228	1.26379	1.2321	0.920423	1.04855	1.09476	1.34868	1.32937	1.31025	1.12756	1.3228	1.26379	1.2321	0.920423	1.04855	1.09476	0.11056	1.22075	1.25717	96.6667	3.44828	ns	0.794118
Cambodia	C6/36	7	A	1.36967	0.719183	0.772426	1.03257	0.676791	1.07149	1.1134	1.02422	1.21012	0.850533	1.36383	1.18572	0.848954	0.960169	0.574587	1.20008	1.0381	0.595352	1.27264	0.868179	1.56364	1.33405	0.860616	1.14917	0.92076	1.20216	0.988934	1.15053	1.31524	0.653224	0.17475	1.02955	1.03534	80	6.89655	ns	0.852941
Cambodia	C6/36	10	A	0.734052	1.31524	1.27483	1.27264	0.703278	0.470915	1.21863	0.809901	1.09845	1.07524	1.34173	1.34127	0.978801	0.95529	1.27288	0.829655	1.18362	1.29784	1.32656	0.976255	1.053	0.844537	1.43223	0.770485	1.28069	0.963083	1.41912	0.899888	1.02421	0.87639	0.213641	1.06802	1.06412	86.6667	3.44828	ns	0.794118
Cambodia	C6/36	1	B																															#NUM!			#DIV/0!	#DIV/0!	ns	0.944444
Cambodia	C6/36	4	B	1.06036	1.31879	1.32844	1.23588	0.639248	1.37815	1.19436	1.16425	1.47276	1.04259	1.30669	1.1131	0.894684	1.00239	1.28482	1.12174	1.4734	1.4123	1.18651	1.61286	1.42285	1.16692	1.43982	1.56265	1.14972	1.26009	1.23487	1.14074	1.35789	0.885231	0.122393	1.2288	1.23538	96.6667	0	ns	0.771429
Cambodia	C6/36	7	B	1.20836	1.30669	1.08734	1.01074	0.479433	1.09391	1.30645	1.18257	1.07205	1.11422	1.32632	0.988934	1.08044	1.28941	1.00734	1.68113	1.18992	1.31524	1.24617	1.11617	1.33941	1.0959	1.03329	0.685333	1.47824	1.6789	1.15242	0.830785	1.14836	1.33428	0.139334	1.16266	1.15039	93.3333	3.44828	ns	0.875
Cambodia	C6/36	10	B	1.2006	0.865302	0.936858	0.639248	0.670633	0.868179	0.795937	1.0236	0.904724	0.747923	1.22703	1.79718	1.06183	0.76072	1.14292	1.0813	1.20474	1.2006	0.84785	1.37815	0.92884	1.05919	0.993957	1.20034	1.47487	1.28288	1.24792	1.32468	1.31713	0.935523	0.176965	1.07069	1.06051	83.3333	0	ns	0.878788
																																		#NUM!			#DIV/0!	#DIV/0!		0.863636
Cambodia	C6/36	4	C	1.46257	1.02694	1.11534	1.34983	1.20836	1.34173	1.56205	0.924809	1.22398	1.13004	1.08734	0.60931	1.21171	1.40656	1.3572	0.829655	1.29255	1.28941	0.504753	1.8103	1.68908	1.15053	1.13004	0.844537	1.18335	1.88316	1.20008	1.78675	1.29712	1.29712	0.131247	1.24021	1.21784	93.3333	3.44828	ns	0.823529
Cambodia	C6/36	7	C	1.01616	0.879429	0.711696	1.29499	0.825138	1.25017	1.14836	1.13226	1.00843	0.928216	0.993432	1.00393	0.890779	1.20424	0.8176	0.90732	1.18889	0.876234	0.863886	0.923842	1.13004	0.718609	0.870687	1.46831	0.988934	1.42766	1.4235	1.20216	0.960494	1.13828	0.134186	1.03979	0.998683	93.3333	0	ns	0.935484
Cambodia	C6/36	10	C	1.12783	1.51096	1.23311	0.693919	1.35995	1.07986	1.33312	1.4521	1.36634	1.12174	1.38379	1.25191	0.978482	1.1562	0.838615	1.0236	1.35099	1.32162	1.41583	1.02421	1.34868	1.6625	1.17331	1.07785	0.817557	1.19201	1.00734	1.29255	1.0533	1.41583	0.150587	1.20217	1.21256	96.6667	0	<0.0001	0.818182
Cambodia		0	NA	1.50166	1.39967	1.28482	1.03088	1.18257	1.17729	1.11757	1.595	1.52389	0.998649	1.47593	1.16103	1.39164	1.43223	0.770891	1.40567	0.817557	1.34127	1.21709	1.36726	1.30645	1.78675	1.09931	1.06622	1.22525	1.18572	1.19827	0.60931	1.31524	1.30764	0.141053	1.24309	1.25503	93.3333	0		0.779801
Cambodia	Alternating	4	A	1.4507	0.506756	1.25751	1.58777	1.55998	1.19191	1.59794	1.25682	1.10067	1.11592	1.34868	1.32937	1.31025	1.12756	1.3228	1.26379	1.2321	0.920423	1.04855	1.09476	1.34868	1.32937	1.31025	1.12756	1.3228	1.26379	1.2321	0.920423	1.04855	1.09476	0.11056	1.22075	1.25717	96.6667	3.44828	ns	0.709677
Cambodia	Alternating	8	A	1.0882	1.22703	1.64138	1.16103	1.6625	1.0387	1.64971	1.37453	0.637781	0.623961	1.14292	1.71924	1.33778	0.938187	1.12313	1.29423	0.96921	1.10524	1.02906	0.748753	1.25415	0.564747	0.926494	1.15808	0.564747	1.02816	0.799056	1.30645	0.75083		0.1951	1.0988	1.10524	75.8621	7.14286	ns	0.714286
Cambodia	Alternating	9	A	1.53987	0.649786	0.291327	0.15599	0.218386	0.258551	0.186146	0.168588	0.688285	0.252841	1.29423	0.230104	0.15785	0.223234	0.672024	0.249584	0.211778	0.247076	0.134407	0.145533	1.01074	0.223234	0.15785	0.190077	0.254526	0.254526	0.226011	0.260572	0.194932		0.0419925	0.370623	0.230104	10.3448	82.1429	<0.0001	0.8
Cambodia	Alternating	10	A	1.28651	0.324459	1.18388	1.50787	1.49771	0.312729	0.413137	0.357348	0.291065	0.879229	1.75243	0.480088	1.28941	1.10777	0.339472	1.49771	0.279041	0.374376	0.339472	1.37271	1.30859	0.441558	1.26305	0.324459	0.847482	0.335778	1.46129	0.409349	0.449944		0.28422	0.818205	0.480088	48.2759	53.5714	<0.0001	0.83871
Cambodia	Alternating	4	B	1.06036	1.31879	1.32844	1.23588	0.639248	1.37815	1.19436	1.16425	1.47276	1.04259	1.30669	1.1131	0.894684	1.00239	1.28482	1.12174	1.4734	1.4123	1.18651	1.61286	1.42285	1.16692	1.43982	1.56265	1.14972	1.26009	1.23487	1.14074	1.35789	0.885231	0.122393	1.2288	1.23538	96.6667	0	ns	0.711207
Cambodia	Alternating	8	B	1.39767	1.47593	0.70593	1.23134	1.50849	1.0381	1.14728	1.92326	1.21453	1.36543	1.41186	0.891895	0.941831	0.926494	0.913971	1.22322	0.834148	1.38424	0.709892	1.18362	0.915331	1.64215	1.0589	1.18388	1.42766	0.899888	0.51453	1.59617	1.21453		0.250583	1.16835	1.18388	89.6552	3.57143	ns	0.7
Cambodia	Alternating	9	B	1.595	0.502276	1.11868	1.38379	1.61672	1.39967	1.48916	1.15053	1.04855	1.23915	0.639734	1.20008	1.45103	1.44004	1.60919	0.75083	1.52798	1.02603	0.400115	0.55135	1.8476	1.0589	1.00611	1.32914	2.66249	1.38693	1.58107	0.578904	1.72123		0.275145	1.25215	1.32914	79.3103	14.2857	ns	0.833333
Cambodia	Alternating	10	B	1.19852	1.3268	0.938187	1.44759	1.12756	1.18257	0.96921	1.26305	1.46576	1.16959	1.31784	1.1131	0.861696	0.539932	0.820976	0.429403	1.10496	1.15053	1.09732	1.23991	0.747923	0.998961	1.37634	1.20965	1.47593	1.21863	0.920423	1.50166	1.12174		0.171792	1.11503	1.15053	89.6552	7.14286	ns	0.8
Cambodia	Alternating	5	C	1.46257	1.02694	1.11534	1.34983	1.20836	1.34173	1.56205	0.924809	1.22398	1.13004	1.08734	0.60931	1.21171	1.40656	1.3572	0.829655	1.29255	1.28941	0.504753	1.8103	1.68908	1.15053	1.13004	0.844537	1.18335	1.88316	1.20008	1.78675	1.29712	1.29712	0.131247	1.24021	1.21784	93.3333	3.44828	ns	0.702222
Cambodia	Alternating	8	C	0.915331	1.64215	1.0589	1.18388	1.42766	0.899888	0.51453	1.59617	0.565845	1.21453	2.3159	0.962802	0.812322	1.08863	0.61958	0.580651	2.44624	1.71956	1.4294	1.59909	1.28069	0.848586	2.19932	1.37475	0.950385	0.781323	0.402442	1.04229	1.97472		0.339899	1.22233	1.08863	79.3103	14.2857	ns	0.780247
Cambodia	Alternating	9	C	1.39634	0.476831	0.315699	0.181697	0.249584	0.190077	0.224626	0.179975	0.292132	0.308717	1.0959	0.279041	0.442263	0.363401	0.324459	0.194932	0.265314	0.499168	0.28457	0.15785	0.658921	0.319624	0.371032	0.300537	0.249584	0.214699	0.102904	0.124792	0.211778		0.0826467	0.35436	0.28457	6.89655	92.8571	<0.0001	0.875
Cambodia	Alternating	10	C	1.02451	0.873545	0.352968	0.505371	1.06183	0.436591	1.11617	0.513925	0.449944	0.560872	1.04974	0.533549	1.27679	0.484605	0.339472	1.12756	0.636315	0.301573	0.347633	0.375206	1.14972	1.15808	0.464252	0.409349	0.374376	0.988934	0.380972	0.399335	0.413137		0.141698	0.658839	0.505371	34.4828	64.2857	<0.0001	0.75
Laos		0	NA	1.62306	0.850053	1.10326	1.46491	1.06124	1.15781	0.759079	1.41583	1.57397	1.37362	1.3228	0.865302	1.2063	1.31025	1.48287	0.706373	1.14917	1.07176	1.43049	0.75785	1.17331	0.865302	1.11617	0.725516	0.999585	0.999585	0.848586	1.17331	1.12313	0.69526	0.254158	1.11353	1.11965	83.3333	0		0.81705
Laos	MDM	1	A	1.54359	0.503673	0.285119	0.397475	0.343178	0.352968	0.516234	0.5177	1.04229	0.507866	0.990057	0.429085	0.963102	0.363026	0.317977	0.382656	0.332633	0.46797	0.496978	0.23363	1.35192	0.361791	0.44542	0.161993	0.188636	0.315518	0.306315	0.3863	0.191406	0.403216	0.0953318	0.503324	0.391888	16.6667	86.2069	<0.0001	0.963725
Laos	MDM	4	A	0.745889	0.265458	0.481099	0.300019	0.406916	0.872209	0.393095	0.349643	0.388359	0.223409	0.336015	0.90878	0.547844	0.505445	0.22271	0.485647	0.48045	0.799668	0.510774	0.372292	0.761463	0.299563	0.238902	0.577426	0.323617	0.487051	0.453133	0.399041	0.733734	0.594435	0.122396	0.482136	0.466792	6.66667	82.7586	<0.0001	1.10641
Laos	MDM	7	A	1.06378	0.295907	0.324459	0.198295	0.207698	0.243345	0.773031	0.268378	0.223671	0.185304	1.11009	0.204391	0.226092	0.753364	0.12848	0.183513	0.502975	0.32572	0.309977	0.373178	1.31945	0.420331	0.380972	0.829749	0.484487	0.678944	0.299563	0.396252	0.407153	0.203723	0.119045	0.444076	0.32509	13.3333	79.3103	<0.0001	1.31922
Laos	MDM	10	A	0.46379	0.354946	0.342043	0.51123	0.471739	0.277993	0.12634	0.37072	0.157974	0.145127	0.555993	0.308212	0.253378	0.403216	0.333569	0.257945	0.279672	0.269464	0.252685	0.107714	0.390861	0.360655	0.35806	0.270905	0.41436	0.660955	0.402685	0.332633	0.115052	0.248492	0.0726352	0.326614	0.333101	0	96.5517	<0.0001	1.19067
Laos	MDM	1	B	0.436772	0.720181	0.47854	0.216234	0.16271	0.349418	0.384435	0.15599	0.217937	0.161993	1.58434	0.402685	0.258551	0.247076	0.410585	0.323617	0.200928	0.242303	0.207698	0.131624	1.14081	0.509358	1.53232	0.276377	0.360007	0.571223	0.300019	0.349643	0.290859	0.203723	0.101444	0.427598	0.311818	10	86.2069	<0.0001	0.884632
Laos	MDM	4	B	0.828719	0.758056	0.600169	0.905498	1.1131	1.06549	0.345156	0.438195	1.00804	0.334855	0.873189	1.14598	0.801203	0.841305	0.720125	0.781723	0.787083	0.669703	0.61744	0.93893	0.726908	0.905498	0.673877	0.438195	0.492417	0.509208	0.449252	0.269969	0.81765	0.911669	0.147114	0.72562	0.769889	43.3333	27.5862	<0.0001	1
Laos	MDM	7	B	0.929221	0.341132	0.35806	0.308842	0.402685	0.485329	0.306758	0.314963	0.497995	0.21224	1.57363	0.551101	0.347296	0.396645	1.09944	0.485329	0.52193	0.276377	0.480612	0.517925	1.51101	0.481099	0.816889	0.464295	0.456003	0.541155	0.592762	0.290329	0.370402	0.368505	0.109171	0.543332	0.472454	16.6667	86.2069	<0.0001	1.2189
Laos	MDM	10	B	0.371506	0.47854	0.637114	0.448297	0.181916	0.270325	0.327448	0.200928	0.305741	0.0848649	0.539969	0.284844	0.112313	0.389514	0.392895	0.498738	0.253378	0.497646	0.432742	0.588145	0.543133	0.472444	0.457581	0.340445	0.327386	0.46797	0.538559	0.407153	0.205246	0.619768	0.0981677	0.389218	0.400024	0	93.1034	<0.0001	1.04352
Laos	MDM	1	C	0.307837	0.402542	1.01062	0.287633	0.300537	0.303245	0.081352	0.174709	0.174709	0.229087	1.36452	0.300019	0.309853	0.173367	0.390861	0.168008	0.426858	0.228919	0.265676	0.120505	0.564229	0.357623	0.258551	0.374014	0.840032	0.247076	0.252841	0.120505	0.173367	0.168008	0.101946	0.345904	0.276655	10	89.6552	<0.0001	0.919341
Laos	MDM	4	C	0.48219	0.541804	0.513925	0.355657	0.229087	0.40495	0.513925	0.435967	0.600624	0.247232	0.63858	0.234877	0.268378	0.476219	0.452746	0.282373	0.420655	0.238821	0.496747	0.374844	0.655159	0.294054	0.390762	0.354946	0.36516	0.349418	0.402685	0.375206	0.295907	0.161993	0.0962209	0.395163	0.382984	0	89.6552	<0.0001	0.949484
Laos	MDM	7	C	0.437883	0.494152	0.428037	0.399041	0.486727	0.559655	0.388665	0.446512	0.425803	0.218386	0.561564	0.629951	0.393937	0.455834	0.417492	0.269389	0.230104	0.28573	0.440897	0.370664	0.591215	0.404183	0.374844	0.360655	0.308842	0.402685	0.487326	0.481099	0.4313	0.234216	0.0552174	0.413893	0.421648	0	96.5517	<0.0001	1.00337
Laos	MDM	10	C	0.376966	0.529742	0.234547	0.465674	0.378925	0.48561	0.40442	0.240855	0.15599	0.38766	0.5252	0.494464	0.406342	0.340845	0.523272	0.387055	0.405574	0.46097	0.511991	0.192217	0.462991	0.577625	0.242783	0.375724	0.390662	0.323617	0.419358	0.276377	0.264796	0.533149	0.0809963	0.392513	0.397541	0	100	<0.0001	1.04352
Laos		0	NA	1.62306	0.850053	1.10326	1.46491	1.06124	1.15781	0.759079	1.41583	1.57397	1.37362	1.3228	0.865302	1.2063	1.31025	1.48287	0.706373	1.14917	1.07176	1.43049	0.75785	1.17331	0.865302	1.11617	0.725516	0.999585	0.999585	0.848586	1.17331	1.12313	0.69526	0.254158	1.11353	1.11965	83.3333	0		0.81705
Laos	C6/36	1	A	1.74798	0.446469	1.77696	0.982295	0.308717	0.600044	0.292132	1.00393	0.300537	1.06622	1.00734	1.44026	0.399335	1.19827	0.499168	0.312729	1.34983	0.426489	1.0342	1.17331	1.39276	1.43982	1.32374	0.927499	1.60435	1.04974	1.05092	1.77696	1.36817		0.3903	1.01035	1.04974	68.9655	28.5714	ns	0.812376
Laos	C6/36	4	A	1.47593	1.55064	0.999585	1.70011	1.53124	1.15161	1.69754	1.59285	1.64062	1.31713	1.35789	1.95139	1.12756	1.09391	1.58736	1.27312	1.61845	1.09419	1.06271	1.32162	1.13526	1.47593	1.58501	1.02421	1.11422	1.40921	1.30859	1.53773	0.458174		0.229901	1.35151	1.35789	96.5517	3.57143	ns	0.687294
Laos	C6/36	7	A	1.52762	1.14108	1.30764	1.39276	1.81254	1.54178	1.66797	0.768158	1.03547	1.5621	1.43049	1.0589	0.529449	1.47677	2.02648	1.08569	1.75997	0.854533	1.38519	1.52808	1.53677	1.96289	1.23601	1.06418	0.503673	1.50916	0.906271	1.55129	1.13677		0.265598	1.32068	1.39276	89.6552	7.14286	ns	0.714113
Laos	C6/36	10	A	1.40678	1.82985	1.27068	1.65108	1.52026	1.45382	1.42558	1.43294	1.05691	1.25793	1.32468	1.09597	1.27508	1.32468	0.520102	0.637538	1.35708	1.24617	1.89458	1.2882	1.90675	1.29857	1.40404	1.47995	0.848449	0.453089	1.57383	1.33773	1.32362		0.118696	1.30676	1.32468	89.6552	7.14286	ns	0.742702
Laos	C6/36	1	B	1.85298	1.48267	0.426489	1.52062	1.24792	1.07986	1.29712	0.755379	1.71542	1.26305	1.49522	0.956594	1.94163	0.441558	1.30978	1.00611	1.93021	1.39276	1.67352	1.36178	1.28482	0.923798	1.20008	1.0533	0.838615	1.40523	1.18257	1.28845	1.6565		0.233664	1.27531	1.28845	89.6552	7.14286	ns	0.70948
Laos	C6/36	4	B	1.03276	1.07074	0.900063	0.770891	1.78488	1.9254	1.88122	1.1131	1.84966	1.08051	1.24448	1.2557	1.72376	1.55805	1.08827	2.26614	0.715246	1.23771	1.10615	1.50916	0.848767	1.22233	1.35243	1.42705	1.58923	1.22805	1.35708	1.57461	1.41126		0.2382	1.34913	1.2557	93.1034	0	ns	0.707087
Laos	C6/36	7	B	1.76593	1.27068	1.49797	1.07074	1.38063	1.32943	0.988385	1.58834	1.7343	1.46773	1.62542	0.926912	1.32785	1.07074	1.20733	1.59934	1.11184	1.32468	1.56747	1.32362	0.952232	1.62452	1.41343	0.776725	1.71321	1.07446	1.35917	0.887365	0.799861		0.257109	1.30277	1.32785	93.1034	0	ns	0.76456
Laos	C6/36	10	B	1.59407	1.25848	1.54359	1.12624	1.49188	1.57282	0.809901	0.831253	1.08633	0.984828	1.60982	2.01608	1.40727	1.28057	1.52945	1.35657	1.40329	1.13862	1.72213	0.688285	1.73672	2.0804	1.32362	0.947103	0.913971	1.49047	1.20733	1.16959	1.14047		0.228628	1.32625	1.32362	96.5517	0	ns	0.787743
Laos	C6/36	1	C	1.81426	1.66848	1.2785	0.830785	1.84388	1.27777	1.47761	0.918389	0.458174	1.02421	1.53773	1.37067	1.06622	1.88712	1.37067	1.33312	1.58991	0.703278	0.898853	0.484605	1.71924	1.26798	1.44263	1.88911	0.390662	1.55164	0.685333	1.18992	1.26207		0.335763	1.24941	1.2785	82.7586	10.7143	ns	0.733146
Laos	C6/36	4	C	1.27288	1.49751	1.18388	1.45815	1.00456	0.942655	2.05225	1.41126	1.30978	0.687261	1.4834	1.71438	1.46773	1.47345	1.65405	0.81765	1.83139	1.47677	1.1533	1.16959	0.901617	1.59627	1.38063	1.35657	1.39327	1.17557	1.23487	0.539932	1.35243		0.17684	1.3101	1.35657	93.1034	3.57143	ns	0.836448
Laos	C6/36	7	C	1.4959	1.93402	1.16854	1.42051	1.12869	1.96309	1.35917	0.596038	0.944882	0.919618	2.03028	1.70495	1.11687	1.49751	1.12624	1.35657	1.67635	1.19859	1.45622	1.14598	0.536026	1.27508	0.93893	1.65489	1.3857	1.30978	1.2882	1.72579	1.45815		0.229096	1.33836	1.35657	93.1034	7.14286	ns	0.727098
Laos		0	NA	1.62306	0.850053	1.10326	1.46491	1.06124	1.15781	0.759079	1.41583	1.57397	1.37362	1.3228	0.865302	1.2063	1.31025	1.48287	0.706373	1.14917	1.07176	1.43049	0.75785	1.17331	0.865302	1.11617	0.725516	0.999585	0.999585	0.848586	1.17331	1.12313	0.69526	0.254158	1.11353	1.11965	83.3333	0	<0.0001	0.81705
Laos	Alternating	1	A	1.13937	0.479433	0.275672	0.334855	0.247076	0.124792	0.74207	0.346735	0.301573	0.230104	0.354728	0.201221	0.201221	0.312729	0.256966	0.0899876	0.159809	0.303632	0.134407	0.631897	0.547382	0.415389	0.176481	0.549653	0.11162	0.124792	0.151816	0.299501	0.149751	0.176481	0.098174	0.319038	0.266319	3.33333	93.1034	<0.0001	1.04033
Laos	Alternating	4	A	1.23739	0.537623	0.230104	0.335778	0.882411	0.319624	0.256966	0.363401	0.332989	0.223234	1.4521	0.418378	0.479433	0.389863	0.92076	0.357348	0.254526	0.176481	0.334855	0.300537	1.04974	0.623961	0.387461	0.678944	1.36452	0.226011	0.42722	0.339472	0.328278	0.349418	0.104629	0.519294	0.360375	20	75.8621	<0.0001	1.03247
Laos	Alternating	7	A	0.888744	0.279041	0.595352	0.230104	0.124792	0.141184	0.304655	0.223234	0.324459	0.124792	0.70593	0.335778	0.194932	0.28457	0.300537	0.709449	0.141184	0.15785	0.149751	0.0899876	1.13855	0.374376	0.346735	0.159809	0.374376	0.468925	0.52472	0.102904	0.199667	0.214699	0.122976	0.34037	0.281806	6.66667	89.6552	<0.0001	1.03911
Laos	Alternating	10	A	0.389863	0.424293	0.449944	0.194932	0.265314	0.363401	0.582661	0.499168	0.418378	0.282373	1.08275	0.380972	0.409349	0.269969	0.371032	0.403216	0.317671	0.42722	0.470915	0.374376	0.441558	0.425029	0.374376	0.464252	0.339472	0.39463	0.28457	0.32542	0.444372	0.399335	0.0459828	0.409027	0.396982	3.33333	96.5517	<0.0001	1.04256
Laos	Alternating	1	B	0.484605	0.339472	0.190077	0.675724	0.124792	0.268808	0.235458	0.926157	0.368505	0.249584	0.39463	0.374376	1.02603	0.494152	0.194932	0.124792	0.15785	0.0899876	0.190077	0.291065	0.299501	0.363401	0.403216	0.145533	0.124792	0.51453	0.0998337	0.249584	0.179975	0.371032	0.107327	0.331749	0.279937	6.66667	89.6552	<0.0001	1.1163
Laos	Alternating	4	B	0.415389	0.52472	0.347633	0.102904	0.371032	0.380154	0.235458	0.299501	0.389863	0.334855	1.23739	0.28457	0.167427	0.938187	0.279041	1.31713	0.254526	0.936858	0.389863	0.505371	1.85517	0.300537	0.359957	1.14836	0.292132	0.291065	0.436591	0.292132	0.15785	0.223234	0.078775	0.502297	0.353795	20	79.3103	<0.0001	1
Laos	Alternating	7	B	0.499792	0.480088	0.823247	0.411627	0.28457	0.0705949	0.226011	0.15785	0.224626	0.249584	0.449944	0.149751	0.504753	0.292132	0.300537	0.134407	0.15785	0.235458	0.371032	0.423557	0.324459	0.291065	0.409349	0.282373	0.159809	0.201221	0.380972	0.411627	0.357348	0.159809	0.118889	0.314181	0.291599	3.33333	96.5517	<0.0001	1
Laos	Alternating	10	B	0.371032	0.37769	0.449944	0.51453	0.406292	0.141184	0.301573	0.174709	0.127263	0.547382	1.24742	0.449944	0.436591	0.324459	0.292132	0.224626	0.282373	0.11162	0.235458	0.347633	0.368505	0.563087	0.380972	0.301573	0.205813	0.214699	0.28457	0.256966	0.0748753	0.291065	0.0831365	0.343533	0.301573	3.33333	96.5517	<0.0001	1.04204
Laos	Alternating	1	C	0.52472	0.245809	0.308717	0.268808	0.149751	0.269969	0.214699	0.513925	0.526498	0.354728	0.269969	0.406292	0.194932	0.199667	0.268808	0.380154	0.0705949	0.127263	0.354728	0.213245	1.16532	0.151816	0.291065	0.11162	0.380972	0.174709	0.190077	0.468925	0.134407	0.52472	0.102723	0.31523	0.269389	3.33333	96.5517	<0.0001	1.12293
Laos	Alternating	4	C	0.468925	0.300537	0.413137	0.346735	1.28845	0.357348	0.502276	0.39463	0.389863	0.357348	1.56444	1.40855	0.505371	0.413137	0.479433	0.52472	0.576209	0.301573	0.32542	0.402442	0.526498	0.565845	0.335778	0.279041	0.403216	0.425029	0.317671	0.387461	0.235458	0.380972	0.0770061	0.505917	0.402829	10	89.6552	<0.0001	0.935056
Laos	Alternating	7	C	0.145533	0.464252	0.381789	0.226011	0.494152	0.230104	0.159809	0.312729	0.201221	0.250832	0.254526	0.359957	0.39463	0.224626	0.335778	0.319624	0.226011	0.375206	0.368505	0.213245	0.374376	0.59952	0.235458	0.425029	0.374376	0.317671	0.194932	0.201221	0.236774	0.315699	0.0795862	0.30712	0.314214	0	100	<0.0001	1.04033
Laos	Alternating	10	C	0.547382	0.403216	0.319624	0.324459	0.134407	0.28457	0.363401	0.205813	0.223234	0.449252	0.537623	0.332989	0.226011	0.354728	0.224626	0.308717	0.854439	0.374376	0.299501	0.308717	0.449944	1.14972	0.690319	0.339472	0.235458	0.374376	0.441558	0.269969	0.265314	0.249584	0.0768158	0.38476	0.328724	6.66667	89.6552	<0.0001	1.04256
Laos RG		0	NA	0.738414	1.37656	1.22303	1.30078	0.70067	1.45383	1.17682	1.59121	1.49833	1.03707	1.37294	1.21914	1.14292	1.12756	1.7494	1.84152	1.43332	1.17331	0.589037	1.40123	1.30597	1.38063	1.20733	1.61325	1.73815	1.28941	1.91009	1.11198	1.46065	1.10185	0.158866	1.30888	1.30338	90	3.44828		0.89112
Laos RG	MDM	1	A	1.28845	1.72123	1.35628	1.35283	1.0236	1.72791	1.48014	1.27508	0.39463	0.864947	1.22906	0.901617	1.54359	1.16959	1.59617	1.6565	1.36726	1.62977	0.783314	1.8206	0.781323	0.51453	1.39879	1.06037	1.36726	1.09391	1.0882	1.83168	1.40855	0.859524	0.2679	1.25289	1.32064	86.6667	6.89655	ns	0.909004
Laos RG	MDM	2	A	0.499792	2.03576	0.473555	0.570231	0.51453	0.623961	0.502276	0.558089	0.482028	0.629919	1.01627	0.600044	0.43588	0.449944	0.678944	0.476831	0.490358	0.603663	0.43588	0.403216	0.623961	0.499168	0.554164	0.480088	0.625951	0.524127	0.685333	0.593255	0.424293	0.339472	0.077321	0.594366	0.519329	6.66667	65.5172	<0.0001	1.17407
Laos RG	MDM	3	A	0.549653	0.43588	0.452016	0.492255	0.470915	0.425029	0.464252	0.582661	0.479433	0.528856	0.547382	0.468925	0.60108	0.513925	0.499168	0.554164	0.512103	0.374376	0.499792	0.458174	0.681234	0.537623	0.371032	0.265314	0.464252	0.534135	0.49729	0.584264	0.491625	0.524127	0.03765	0.495364	0.498229	0	93.1034	<0.0001	1.15016
Laos RG	MDM	4	A	0.303632	0.28457	0.363401	0.46379	0.178783	0.164732	0.279672	0.317977	0.332633	0.281887	0.424293	0.214699	0.299501	0.223234	0.15785	0.291065	0.235458	0.127263	0.223234	0.179975	0.292132	0.235458	0.274543	0.201221	0.354728	0.400115	0.199667	0.105892	0.224626	0.190077	0.0545565	0.26087	0.255	0	100	<0.0001	1.05005
Laos RG	MDM	7	A	0.235458	0.245809	0.339472	0.247076	0.099834	0.236774	0.159809	0.274543	0.201221	0.124792	0.332989	0.181697	0.176481	0.149751	0.102904	0.223234	0.236774	0.190077	0.078925	0.099834	0.174709	0.145533	0.211778	0.074875	0.181697	0.124792	0.141184	0.194932	0.260572	0.179975	0.054419	0.187583	0.181697	0	100	<0.0001	1.38935
Laos RG	MDM	10	A	0.218386	0.376916	0.154486	0.218386	0.178783	0.178783	0.192217	0.209189	0.123538	0.15599	0.157481	0.132361	0.285119	0.12634	0.150917	0.21224	0.142288	0.201221	0.276377	0.234216	0.241011	0.187188	0.374014	0.305741	0.106073	0.218386	0.168008	0.172581	0.185516	0.168588	0.032034	0.201745	0.186352	0	100	<0.0001	1.13055
Laos RG	MDM	1	B	1.53773	1.31168	1.50166	1.20008	1.59207	1.36178	0.972099	1.49833	1.14836	0.96921	1.00332	1.56364	0.964056	1.48853	1.2591	2.94679	1.48602	0.898503	1.39097	1.14917	1.32656	0.739125	1.43397	1.73672	1.37837	1.50849	1.26132	1.1613	1.10862	1.54359	0.188215	1.34804	1.34417	96.6667	0	ns	0.949947
Laos RG	MDM	2	B	1.01964	0.47421	0.526498	0.403216	0.501658	0.449944	0.254526	0.499168	0.449944	0.490358	0.425029	0.51453	1.47783	0.569139	0.628434	0.823628	0.464252	0.335778	0.413137	0.574044	0.60931	0.611862	0.513925	0.521144	0.530622	0.424293	0.584264	0.468925	0.374376	0.368505	0.0745075	0.543406	0.500413	10	82.7586	<0.0001	1.31614
Laos RG	MDM	3	B	0.607775	0.761949	0.538777	0.473555	0.387461	0.494152	0.449252	0.526498	0.455447	0.425029	0.607775	0.761949	0.538777	0.473555	0.387461	0.494152	0.449252	0.526498	0.455447	0.425029	0.429403	0.42722	0.381789	0.424293	0.490358	0.400115	0.402442	0.324459	0.512103	0.328278	0.0541685	0.478675	0.455447	0	89.6552	<0.0001	1.23516
Laos RG	MDM	4	B	0.396252	0.285119	0.180087	0.375206	0.217937	0.161993	0.13812	0.23363	0.36516	0.227128	0.402442	0.199667	0.145533	0.176481	0.201221	0.279041	0.279041	0.224626	0.15785	0.249584	0.349418	0.250832	0.247076	0.374376	0.299501	0.291065	0.230104	0.134407	0.236774	0.089988	0.055489	0.246655	0.235202	0	100	<0.0001	1.26345
Laos RG	MDM	7	B	0.288108	0.251219	0.217937	0.203149	0.043677	0.12634	0.13812	0.065141	0.228919	0.195331	0.299501	0.179975	0.226011	0.223234	0.201221	0.174709	0.201221	0.214699	0.127263	0.149751	0.235208	0.225406	0.149751	0.174709	0.187706	0.248492	0.192217	0.139524	0.229087	0.192217	0.029189	0.190995	0.198276	0	100	<0.0001	1.2781
Laos RG	MDM	10	B	0.245809	0.399335	0.181697	0.236774	0.249584	0.315699	0.346735	0.245809	0.199667	0.230104	0.223234	0.201221	0.312729	0.181697	0.28457	0.359957	0.167427	0.124792	0.176481	0.201221	0.268808	0.190077	0.332989	0.179975	0.359957	0.167427	0.201221	0.145533	0.141184	0.176481	0.0365515	0.23494	0.212228	0	100	<0.0001	0.919932
Laos RG	MDM	1	C	0.934524	1.42613	1.75562	0.935523	1.13664	1.1613	1.06622	0.589037	0.890847	1.34173	1.5243	0.653224	1.12424	1.22092	1.21863	0.918389	1.053	1.43332	1.24792	0.671562	1.20216	1.15242	1.44004	1.58107	0.947103	1.0233	1.09391	1.60046	1.47255	0.982295	0.203215	1.15995	1.14453	90	3.44828	ns	1.05269
Laos RG	MDM	2	C	2.24487	0.885232	0.603145	0.603145	0.582124	0.442263	0.47421	0.39463	0.60108	0.399335	2.24487	0.885232	0.603145	0.603145	0.582124	0.442263	0.47421	0.39463	0.60108	0.399335	0.616429	1.81374	0.706373	0.547382	0.458174	0.492255	0.641681	0.576209	0.587453	0.480088	0.107639	0.712662	0.584788	16.6667	55.1724	<0.0001	1.286
Laos RG	MDM	3	C	0.357348	0.449944	0.504753	0.639248	0.474865	0.260572	0.446469	0.60108	0.446469	0.390662	0.554164	0.442263	0.458854	0.479433	0.545098	0.558089	0.482028	0.468925	0.51453	0.458854	0.347633	0.524127	0.418378	0.339472	0.480088	0.479433	0.300537	0.449252	0.346735	0.411627	0.046563	0.454364	0.458854	0	93.1034	<0.0001	1.31614
Laos RG	MDM	4	C	0.484605	0.279041	0.174709	0.181697	0.299501	0.201221	0.300537	0.249584	0.268808	0.205813	0.335778	0.300537	0.368505	0.224626	0.236774	0.226011	0.235458	0.268808	0.194932	0.201221	0.347633	0.319624	0.300537	0.51453	0.245809	0.374376	0.359957	0.301573	0.245809	0.256966	0.0434895	0.283499	0.268808	0	100	<0.0001	1.21076
Laos RG	MDM	7	C	0.223234	0.312729	0.265314	0.179975	0.124792	0.249584	0.304655	0.359957	0.190077	0.124792	0.347296	0.168588	0.336015	0.181697	0.112313	0.087354	0.17348	0.172581	0.185304	0.087354	0.358328	0.287022	0.253378	0.178783	0.145127	0.178783	0.157481	0.157481	0.180087	0.158835	0.049221	0.20808	0.180031	0	100	<0.0001	1.22248
Laos RG	MDM	10	C	0.203723	0.243345	0.306315	0.367026	0.243345	0.161993	0.180087	0.234216	0.092758	0.331229	0.315518	0.180087	0.234216	0.228919	0.280782	0.147922	0.157481	0.319443	0.174709	0.168588	0.199667	0.199667	0.214699	0.464252	0.363401	0.236774	0.299501	0.181697	0.28457	0.265314	0.054129	0.242708	0.234216	0	100	<0.0001	1.13649
Laos RG		0	NA	0.738414	1.37656	1.22303	1.30078	0.70067	1.45383	1.17682	1.59121	1.49833	1.03707	1.37294	1.21914	1.14292	1.12756	1.7494	1.84152	1.43332	1.17331	0.589037	1.40123	1.30597	1.38063	1.20733	1.61325	1.73815	1.28941	1.91009	1.11198	1.46065	1.10185	0.158866	1.30888	1.30338	90	3.44828		0.89112
Laos RG	C6/36	1	A	1.96046	1.12866	1.38626	1.08275	1.15161	1.65273	1.16906	1.21914	2.05206	1.49771	1.91009	1.02603	1.55164	1.20216	1.37271	1.29784	1.17305	1.10326	1.40766	1.44436	1.02906	1.39967	1.49271	1.45103	1.04229	1.1613	1.35283	1.22703	1.34173	1.19827	0.154605	1.34951	1.31979	100	0	ns	0.799859
Laos RG	C6/36	4	A	1.45788	1.55245	0.653224	0.607263	1.10552	1.2591	1.34983	1.41275	1.21299	1.16692	1.14319	1.07176	0.725516	1.11198	1.46491	1.33778	0.648919	1.71924	1.07785	0.994587	1.6465	1.09476	1.11757	0.862058	0.650834	0.829655	1.59265	1.40523	1.23991	1.60435	0.253927	1.17057	1.15506	83.3333	0	ns	0.801882
Laos RG	C6/36	7	A	1.29592	0.823628	0.727657	0.781323	0.923462	1.10326	1.24892	0.87639	1.23134	1.6223	0.678944	1.12756	1.10524	0.625458	1.4536	1.17808	1.18992	1.11868	0.723794	1.07437	1.11422	1.09845	1.37634	1.40855	0.860616	1.19852	1.51344	1.36726	1.27777	1.04289	0.186227	1.1056	1.11645	83.3333	0	ns	0.87088
Laos RG	C6/36	10	A	1.6683	1.88976	1.16959	1.27483	0.990818	1.44263	1.51775	1.49605	1.20216	0.774915	1.57317	1.67221	0.865302	1.41363	1.49958	1.84033	1.52573	1.8247	1.30287	1.65743	1.2221	1.56277	1.71924	1.39143	1.07499	1.02408	0.930038	0.62212	1.39138	1.13659	0.243922	1.35588	1.40253	93.3333	0	ns	0.685525
Laos RG	C6/36	1	B	0.974658	1.26798	0.844537	0.983249	1.57317	1.39522	1.16986	1.20733	1.20552	1.18599	1.48687	1.38542	1.50731	1.16762	1.53379	1.45022	1.6648	1.50075	1.80674	0.619262	0.93951	1.00332	1.09419	1.12866	1.64801	1.53245	1.17331	1.01351	1.00981	1.43332	0.225035	1.26355	1.20642	96.6667	0	ns	0.70948
Laos RG	C6/36	4	B	1.36329	1.23401	0.995935	1.50079	1.2543	1.37274	1.12066	0.635123	1.69971	1.03014	1.54742	1.3228	0.94842	1.21888	1.65443	0.659395	0.793191	0.948751	2.13084	1.31524	1.5157	1.06622	1.53894	1.67426	1.0414	1.40567	1.33055	1.02694	1.14836	1.02451	0.218427	1.25062	1.24415	90	0	ns	0.80632
Laos RG	C6/36	7	B	1.66942	1.0233	0.870687	1.22906	1.19436	1.61383	1.11198	1.55485	1.52001	1.87521	1.65254	1.86321	0.935523	1.27679	0.838615	1.22703	1.2882	1.01351	1.47677	1.36543	1.91361	1.44726	1.02546	1.00367	1.00489	1.36717	1.25545	1.63589	1.74836	1.60173	0.294185	1.35346	1.32682	100	0	ns	0.864349
Laos RG	C6/36	10	B	1.07524	1.0959	1.19436	1.76005	1.29712	1.29808	1.64801	1.53712	0.759079	0.997401	2.0919	1.40567	0.92884	0.560872	0.77411	1.36247	1.4246	0.891895	1.2394	1.54923	1.4383	1.43484	1.43657	0.939841	1.4681	1.53894	1.45403	1.21888	0.923462	2.02917	0.213815	1.29245	1.33027	90	3.44828	ns	0.714113
Laos RG	C6/36	1	C	1.43484	1.17729	0.723794	1.25415	1.83898	1.2394	1.23538	1.20759	0.744578	1.01074	1.11198	1.16906	1.26798	0.90196	1.15242	1.47846	1.37837	1.02906	1.3268	0.988934	1.2836	1.43982	1.04944	0.958871	0.978482	1.42285	1.54521	1.49584	1.55665	1.51096	0.199939	1.23045	1.23739	93.3333	0	ns	0.766503
Laos RG	C6/36	4	C	1.10777	0.449252	0.963083	0.770891	1.3979	1.20733	1.60221	1.19306	1.37271	1.10524	1.54762	1.41891	1.40766	1.84692	1.50787	1.27092	1.44069	1.36817	1.19827	1.06271	1.33778	1.51344	0.549085	0.831159	1.29519	0.650834	1.09476	1.88911	1.43027	1.23285	0.17655	1.23546	1.28306	86.6667	6.89655	ns	0.8386
Laos RG	C6/36	7	C	0.858663	1.7847	0.766966	1.17439	1.32117	1.13075	1.06947	0.928509	1.81258	1.18995	1.61845	1.10777	1.17491	0.915668	0.804884	0.998961	1.61942	1.31025	1.77836	0.521144	1.56304	1.47276	1.24817	1.47487	1.51261	1.18887	1.48958	1.36817	0.904724	1.10524	0.278545	1.2405	1.18941	93.3333	3.44828	ns	0.80632
Laos RG	C6/36	10	C	1.48455	1.35076	1.30645	1.60977	1.9426	1.49188	1.21684	1.27068	1.4246	1.47593	1.90078	1.43722	1.59812	1.26305	1.06183	2.21245	1.86721	1.44888	1.06124	1.30788	1.45531	1.07437	1.02694	1.15161	0.780125	1.62709	1.18651	1.397	1.11534		0.205804	1.39817	1.397	96.5517	0	ns	0.685525
Laos RG		0	NA	0.738414	1.37656	1.22303	1.30078	0.70067	1.45383	1.17682	1.59121	1.49833	1.03707	1.37294	1.21914	1.14292	1.12756	1.7494	1.84152	1.43332	1.17331	0.589037	1.40123	1.30597	1.38063	1.20733	1.61325	1.73815	1.28941	1.91009	1.11198	1.46065	1.10185	0.158866	1.30888	1.30338	90	3.44828	ns	0.89112
Laos RG	Alternating	1	A	1.0854	1.41046	1.13845	0.978507	1.70382	1.23466	1.22311	1.42286	1.36539	1.5575	1.33015	1.40933	1.57271	1.07475	1.25918	0.600044	0.969872	1.19687	0.983961	1.34783	1.6336	1.21685	1.29077	1.33196	1.99466	1.16186	1.25484	1.28497	1.34435	1.01068	0.135443	1.27965	1.27207	96.6667	0	ns	0.666373
Laos RG	Alternating	2	A	1.74352	1.68926	1.71215	1.89503	1.71416	1.60085	1.77907	1.43223	1.61845	2.10658	1.77626	1.85517	2.28816	1.95331	1.82811	1.79978	1.65499	1.75935	1.51096	0.899888	1.51939	1.56344	1.18572	1.78326	1.71488	0.898503	1.0533	1.80323	2.00197	1.91335	0.12716	1.66848	1.7292	100	0	ns	0.61264
Laos RG	Alternating	4	A	1.55665	0.924809	1.29784	1.63606	1.57851	1.38446	2.10022	0.935523	1.09845	1.30287	1.17544	1.42613	0.908499	1.32468	1.22372	1.67352	1.15808	1.72123	1.8218	1.78623	1.25311	1.42422	1.66037	1.80937	1.65049	1.16562	0.966334	1.37528	0.558401	0.996658	0.268805	1.36315	1.34998	96.6667	3.44828	ns	0.673473
Laos RG	Alternating	5	A	0.631897	2.1891	0.718609	0.43588	0.423557	0.359957	0.482028	0.349418	0.374376	0.476831	1.28845	0.381789	0.545098	0.424293	0.409349	0.458854	0.449944	0.339472	0.354728	0.529449	0.611862	0.52472	0.425029	0.458854	0.458174	0.987355	0.446469	0.727657	0.505371	0.411627	0.0685705	0.572673	0.458514	10	79.3103	<0.0001	0.649631
Laos RG	Alternating	7	A	0.406292	0.499168	0.715134	0.43588	0.582124	0.411627	0.43588	0.521144	0.274543	0.303632	1.80875	0.482028	0.49729	0.374376	0.292132	0.381789	0.256966	0.339472	0.265314	0.32542	0.190077	0.334855	0.223234	0.32542	0.235458	0.214699	0.368505	0.444372	0.332989	0.374376	0.07612	0.421765	0.371441	3.33333	93.1034	<0.0001	0.909004
Laos RG	Alternating	10	A	1.24405	0.69775	0.531359	0.527128	0.310352	0.738201	0.420331	0.142288	0.330699	0.195031	0.776525	0.381789	0.368505	0.43588	0.292132	0.199667	0.190077	0.359957	0.256966	0.710329	0.989876	0.935523	0.359957	0.349418	0.201221	0.299501	0.479433	0.334855	0.15785	0.149751	0.159513	0.445547	0.359957	10	79.3103	<0.0001	0.787743
Laos RG	Alternating	1	B	1.74352	1.68926	1.71215	1.89503	1.71416	1.60085	1.77907	1.43223	1.61845	2.10658	1.77626	1.85517	2.28816	1.95331	1.82811	1.79978	1.65499	1.75935	1.51096	0.899888	1.51939	1.56344	1.18572	1.78326	1.71488	0.898503	1.0533	1.80323	2.00197	1.91335	0.12716	1.66848	1.7292	100	0	<0.0001	0.738891
Laos RG	Alternating	3	B	2.02903	1.49127	0.549085	0.374376	0.559237	0.649786	0.375412	0.339759	0.402685	0.334443	1.27068	0.368505	1.70322	0.564747	0.563087	0.426489	0.660812	0.347633	0.347633	0.458854	1.57397	0.554164	0.672024	0.426489	1.16238	0.470915	0.464252	0.460208	0.449252	0.491625	0.106376	0.684733	0.48127	20	72.4138	<0.0001	0.856999
Laos RG	Alternating	4	B	1.26798	1.29448	0.446469	0.817557	0.851881	0.151816	0.223234	1.10524	0.357348	0.254526	1.45531	0.879229	0.963083	2.02548	0.315699	0.672024	0.282373	0.214699	0.213245	0.390662	1.73592	1.00922	0.157481	0.349418	0.262363	0.567804	0.149751	0.391111	0.61769	0.360169	0.229389	0.659442	0.41879	36.6667	58.6207	<0.0001	0.737678
Laos RG	Alternating	5	B	0.538777	1.26207	0.616429	1.50849	0.603663	0.315699	0.349418	0.727657	0.436591	0.521144	1.37475	0.578904	0.983249	0.387461	0.494152	0.644102	0.28457	0.674339	0.375206	1.32303	0.792798	1.27947	0.455447	0.862058	1.35903	0.476831	1.30167	0.521144	0.533549	0.892937	0.202669	0.749154	0.610046	33.3333	44.8276	<0.0001	0.949947
Laos RG	Alternating	7	B	0.611132	0.609123	0.485329	0.243345	0.371138	0.157481	0.120505	0.258551	0.457026	0.112313	0.829655	0.357348	1.34173	0.429403	0.304655	0.214699	0.249584	0.623961	0.371032	0.299501	0.505371	0.324459	0.279041	0.141184	0.799056	0.275672	0.249584	0.315699	0.199667	0.141184	0.114868	0.389281	0.310177	6.66667	82.7586	<0.0001	0.919932
Laos RG	Alternating	10	B	1.5157	0.727657	0.300537	0.226011	0.319624	0.194932	0.194932	0.324459	0.149751	0.374376	1.46831	0.201221	0.315699	0.429403	0.275672	0.224626	0.256966	0.357348	0.205813	0.315699	1.29519	0.479433	0.569139	0.492255	0.458854	0.35031	0.274543	0.194932	0.315699	0.458854	0.111795	0.442265	0.317662	10	89.6552	<0.0001	0.93544
Laos RG	Alternating	1	C	1.5215	1.25032	0.689327	1.44356	1.02613	1.65577	1.3189	1.66209	0.956307	1.61183	0.980891	1.15332	1.02422	1.09792	0.623867	1.24294	1.54143	1.53379	1.1075	1.56021	1.35056	1.14892	1.02968	1.04576	1.39166	1.49814	0.760134	1.30443	1.23059	1.13398	0.208859	1.22986	1.23677	90	0	ns	0.651855
Laos RG	Alternating	4	C	1.61838	1.07947	1.37766	0.663688	1.12652	1.01099	1.16447	1.95331	1.17684	0.792823	1.72123	0.678944	1.24217	1.73277	1.31997	1.07437	1.31713	0.347633	0.51453	1.43679	1.22398	2.19691	0.938187	1.24342	1.31358	1.58638	1.51836	0.723794	1.12756	1.06826	0.212898	1.20967	1.20041	80	6.89655	<0.0001	0.593482
Laos RG	Alternating	5	C	0.538777	1.26207	0.616429	1.50849	0.603663	0.315699	0.349418	0.727657	0.436591	0.521144	1.37475	0.578904	0.983249	0.387461	0.494152	0.644102	0.28457	0.674339	0.375206	1.32303	0.792798	1.27947	0.455447	0.862058	1.35903	0.476831	1.30167	0.521144	0.533549	0.892937	0.202669	0.749154	0.610046	33.3333	44.8276	<0.0001	0.78924
Laos RG	Alternating	7	C	1.50787	0.495412	0.312729	0.449944	0.354728	0.167427	0.403216	0.291065	0.458854	0.226011	0.413137	0.37769	0.47421	0.389863	0.368505	0.352968	0.476831	0.159809	0.214699	0.167427	0.547382	0.282373	0.179975	0.308717	0.127263	0.300537	0.078925	0.354728	0.190077	0.214699	0.117623	0.354902	0.332848	3.33333	100	<0.0001	0.904666
Laos RG	Alternating	10	C	1.54036	0.55135	1.02451	0.381789	0.339472	0.389863	0.706373	0.299501	0.319624	0.236774	1.22931	0.749171	0.436591	0.299501	0.247076	0.236774	0.181697	1.27288	0.324459	0.371032	1.26132	0.265314	1.23538	0.519354	0.460208	0.214699	0.441558	1.18887	0.249584	0.519354	0.155778	0.583125	0.413227	23.3333	72.4138	<0.0001	0.939355

## Sheet: C6 36 data
Virus	cell type	passage	line	foci sizes (mm)																														Foci size "median absolute deviation"	Foci size "mean"	Foci size "median"	Foci size >0.4 (percentages)	Foci size <0.3 (percentages)	Foci size significant difference to p0 (p<0.01: two-way Anoova, Dunnetts's correction)	Relative Infectivity
Cambodia		0	NA	0.399335	0.486689	0.280782	0.517887	0.430533	0.249584	0.430533	0.349418	0.355657	0.368137	0.586523	0.492929	0.336939	0.48045	0.542846	0.205907	0.361897	0.31822	0.611481	0.393095	0.505408	0.561564	0.511648	0.418054	0.274543	0.293261	0.174709	0.330699	0.599002	0.461731	0.0873545	0.410982	0.408694	50	20.6897		0.779801
Cambodia	MDM	2	A	1.12174	1.09732	0.703278	0.335778	0.282373	0.418378	0.823247	0.526498	0.690319	0.560872	0.339472	0.299501	0.352968	0.656556	0.349418	0.730645	0.363401	0.449944	0.75083	0.334855	0.655127	0.399335	0.547382	0.759079	0.484605	0.474865	0.409349	0.549653	0.381789	0.715134	0.154358	0.552124	0.505552	66.6667	6.89655		0.817988
Cambodia	MDM	3	A	0.260572	0.254526	0.375206	0.315699	0.312729	0.339472	0.245809	0.174709	0.291065	0.308717	0.274543	0.303632	0.402442	0.303632	0.303632	0.0998337	0.201221	0.275672	0.11162	0.501658	0.223234	0.214699	0.363401	0.275672	0.124792	0.235458	0.124792	0.213245	0.43588	0.145533	0.0561409	0.267103	0.275107	10	58.6207	<0.0001	0.950011
Cambodia	MDM	4	A	0.446444	0.249584	0.537604	0.339497	0.282342	0.359963	0.181697	0.460233	0.24584	0.269988	0.254513	0.308736	0.223253	0.205782	0.308736	0.199667	0.303619	0.394655	0.21327	0.284588	0.230117	0.268802	0.282342	0.235483	0.374376	0.141202	0.24584	0.250832	0.190058	0.279035	0.0393407	0.285603	0.269395	10	68.9655	<0.0001	1.20383
Cambodia	MDM	10	A	0.324279	0.209744	0.199081	0.219185	0.30015	0.179651	0.245179	0.215154	0.172581	0.275179	0.368505	0.201221	0.124792	0.124792	0.249584	0.236774	0.201221	0.224626	0.102904	0.254526	0.211778	0.269969	0.324459	0.491625	0.388259	0.256966	0.300537	0.230104	0.43588	0.282373	0.0405761	0.254036	0.240977	6.66667	75.8621	<0.0001	1.42149
Cambodia	MDM	2	B	0.406292	0.339472	0.32542	0.429403	0.335778	0.55135	0.458854	0.43588	0.460208	0.315699	0.460208	0.43588	0.589037	0.484605	0.312729	0.363401	0.578904	0.339472	0.549085	0.446469	0.505371	0.490358	0.79437	0.653224	0.387461	0.818699	0.681689	0.464252	0.473555	0.324459	0.0906864	0.47372	0.459531	70	0		0.943835
Cambodia	MDM	3	B	0.315699	0.174709	0.300537	0.300537	0.282373	0.256966	0.190077	0.201221	0.308717	0.174709	0.205813	0.268808	0.174709	0.223234	0.254526	0.141184	0.127263	0.174709	0.279041	0.236774	0.402442	0.303632	0.279041	0.214699	0.205813	0.245809	0.254526	0.205813	0.190077	0.205813	0.0444821	0.236642	0.230004	3.33333	82.7586	ns	0.856762
Cambodia	MDM	4	B	0.524751	0.236793	0.284588	0.167409	0.256947	0.451997	0.249584	0.319593	0.300562	0.223253	0.354722	0.249584	0.325395	0.308736	0.284588	0.381801	0.230117	0.254513	0.199667	0.149751	0.413124	0.30468	0.250832	0.176456	0.201227	0.223253	0.124792	0.249584	0.235483	0.368511	0.0517263	0.276743	0.252673	10	65.5172	<0.0001	1.09441
Cambodia	MDM	10	B	0.245809	0.247076	0.205813	0.308717	0.275672	0.268808	0.179975	0.201221	0.304655	0.174709	0.245809	0.247076	0.205813	0.308717	0.275672	0.268808	0.179975	0.201221	0.304655	0.174709	0.279041	0.224626	0.291065	0.124792	0.201221	0.176481	0.279041	0.247076	0.254526	0.455448	0.0426259	0.245274	0.247076	3.33333	82.7586	<0.0001	1.22768
Cambodia	MDM	1	C	0.537623	0.473555	0.39463	0.335778	0.400115	0.512103	0.879229	0.452016	0.347633	0.368505	0.558089	0.279041	0.37769	0.780125	0.332989	0.549653	0.324459	0.249584	0.354728	0.375206	0.593255	0.737016	0.374376	0.402442	0.249584	0.250832	0.357348	0.611862	0.300537	0.678944	0.086509	0.447965	0.38616	46.6667	13.7931		0.999125
Cambodia	MDM	2	C	0.214699	0.199667	0.201221	0.245809	0.211778	0.230104	0.226011	0.254526	0.223234	0.223234	0.300537	0.37769	0.32542	0.174709	0.201221	0.299501	0.363401	0.205813	0.230104	0.226011	0.223234	0.224626	0.235458	0.226011	0.279041	0.28457	0.223234	0.352968	0.194932	0.151816	0.0224938	0.244353	0.226011	0	82.7586	ns	0.954744
Cambodia	MDM	3	C	0.349418	0.284588	0.325395	0.167409	0.15181	0.328266	0.299501	0.21327	0.300562	0.224626	0.324459	0.199667	0.224626	0.359963	0.214705	0.157862	0.199667	0.256947	0.223253	0.30156	0.230117	0.265308	0.260566	0.279035	0.394655	0.359963	0.223253	0.250832	0.424293	0.194925	0.0447692	0.26635	0.258756	3.33333	68.9655	<0.0001	1.19136
Cambodia	MDM	4	C	0.543563	0.228919	0.296431	0.25651	0.41318	0.0921278	0.222972	0.230865	0.22943	0.207417	0.234877	0.199667	0.271835	0.220514	0.310352	0.0436772	0.112488	0.276945	0.192217	0.123538	0.217937	0.217937	0.13812	0.180949	0.247232	0.242783	0.193528	0.243345	0.269464	0.120505	0.033073	0.225977	0.225945	6.66667	93.1034	<0.0001	1.14174
Cambodia		0	NA	0.399335	0.486689	0.280782	0.517887	0.430533	0.249584	0.430533	0.349418	0.355657	0.368137	0.586523	0.492929	0.336939	0.48045	0.542846	0.205907	0.361897	0.31822	0.611481	0.393095	0.505408	0.561564	0.511648	0.418054	0.274543	0.293261	0.174709	0.330699	0.599002	0.461731	0.0873545	0.410982	0.408694	50	20.6897	ns	0.779801
Cambodia	C6/36	4	A	0.352138	0.405574	0.393095	0.314963	0.382656	0.572858	0.306758	0.358328	0.418472	0.596725	0.432879	0.241011	0.469674	0.566294	0.269464	0.26801	0.719832	0.459191	0.318157	0.626513	0.552829	0.517095	0.55248	0.553777	0.265314	0.331579	0.680572	0.623867	0.457026	0.222186	0.122861	0.440977	0.425675	56.6667	17.2414	0.04	0.878431
Cambodia	C6/36	7	A	0.851881	0.811823	0.474865	0.32542	0.430851	0.512103	0.449944	0.558089	0.334855	0.324459	0.607263	0.490358	0.425029	0.505371	0.611862	0.51453	0.347633	0.390662	0.425029	0.538777	0.52472	0.505371	0.636315	0.74081	0.455448	0.538777	0.658921	0.236774	0.324459	0.425029	0.0728349	0.499248	0.497864	76.6667	3.44828	0.006	0.794118
Cambodia	C6/36	10	A	0.576209	0.505371	0.484605	0.792798	0.43588	0.600044	0.600044	0.533549	0.51453	0.458174	0.789254	0.402442	0.505371	0.718609	0.35031	0.983249	0.380972	0.308717	0.406292	0.502276	0.539932	0.744578	0.54795	0.402442	0.406292	0.254526	0.425029	0.603663	0.35031	0.54795	0.096483	0.522379	0.505371	83.3333	3.44828	ns	0.852941
Cambodia	C6/36	4	B	0.274543	0.274823	0.230104	0.47801	0.326912	0.399335	0.26917	0.539932	0.337457	0.336015	0.345949	0.287022	0.399335	0.356531	0.287633	0.234216	0.226011	0.288108	0.251219	0.560872	0.51453	0.269969	0.176481	0.260572	0.32542	0.43588	0.460208	0.102904	0.315699	0.539932	0.0646642	0.336826	0.32056	23.3333	44.8276	ns	0.944444
Cambodia	C6/36	7	B	0.722122	0.461731	0.70067	0.399041	0.413137	0.407153	0.388665	0.446512	0.640283	0.343347	0.548979	0.428405	0.224626	0.493915	0.364468	0.473099	0.51347	0.819697	0.388359	0.295907	0.458854	0.52472	0.368505	0.339472	0.599002	0.324459	0.399335	0.528856	0.375206	0.530622	0.0745009	0.464087	0.437459	60	6.89655	ns	0.771429
Cambodia	C6/36	10	B	0.724225	0.390662	0.484605	0.725516	0.399335	0.425029	0.948751	0.613896	0.529449	0.547382	0.599002	0.649399	0.418378	0.235458	0.300537	0.623961	0.363401	0.339472	0.371032	0.357348	0.648919	0.402442	0.374376	0.380154	0.42722	0.43588	0.458854	0.824009	0.352968	0.300537	0.0799044	0.488407	0.426124	60	3.44828	ns	0.875
Cambodia	C6/36	4	C	0.352968	0.35031	0.380972	0.32542	0.346735	0.455448	0.304655	0.339472	0.380154	0.124792	0.254526	0.387461	0.505371	0.223234	0.300537	0.524127	0.149751	0.28457	0.406292	0.406292	0.332989	0.42722	0.399335	0.390662	0.28457	0.436591	0.249584	0.781723	0.371032	0.291065	0.0546527	0.358929	0.351639	26.6667	27.5862	ns	0.863636
Cambodia	C6/36	7	C	0.499168	0.201221	0.43588	0.371032	0.81259	0.332989	0.352968	0.260572	0.409349	0.449944	0.480088	0.851881	0.779726	0.458854	0.413137	0.664568	0.332989	0.406292	0.898503	0.371032	0.816028	0.245809	0.681689	0.347633	0.339472	0.245809	0.576209	0.436591	0.545098	0.380154	0.0882779	0.479909	0.424508	60	13.7931	ns	0.823529
Cambodia	C6/36	10	C	0.458174	0.51453	0.332989	0.535882	0.324459	0.201221	0.275672	0.235458	0.32542	0.425029	0.560872	0.499168	0.460208	0.449252	0.52472	0.647958	0.399335	0.604181	0.69347	0.631897	0.519354	0.43588	0.491625	0.513925	0.587453	0.509052	0.357348	0.449944	0.449944	0.576209	0.0682738	0.466354	0.475917	73.3333	10.3448	ns	0.935484
Cambodia		0	NA	0.399335	0.486689	0.280782	0.517887	0.430533	0.249584	0.430533	0.349418	0.355657	0.368137	0.586523	0.492929	0.336939	0.48045	0.542846	0.205907	0.361897	0.31822	0.611481	0.393095	0.505408	0.561564	0.511648	0.418054	0.274543	0.293261	0.174709	0.330699	0.599002	0.461731	0.0873545	0.410982	0.408694	50	20.6897		0.779801
Cambodia	Alternating	1	A	0.505371	0.335778	0.385695	0.271192	0.91331	0.383517	0.362384	0.380616	0.461987	0.37671	0.336533	0.429809	0.437883	0.420331	0.558401	0.318157	0.242783	0.380616	0.436772	0.268378	0.391853	0.408301	0.329994	0.741702	0.411814	0.588045	0.588045	0.408445	0.274543	0.327386	0.0526186	0.422545	0.388774	46.6667	13.7931	ns	0.709677
Cambodia	Alternating	8	A	0.599295	0.362222	0.505564	0.43588	0.345949	0.314033	0.25832	0.38036	0.46379	0.249584	0.396252	0.486689	0.399335	0.326675	0.547382	0.340614	0.428854	0.461731	0.445508	0.625021	0.396252	0.486689	0.399335	0.326675	0.547382	0.340614	0.428854	0.461731	0.445508	0.625021	0.0622338	0.427704	0.428854	53.3333	6.89655	ns	0.714286
Cambodia	Alternating	9	A	0.348076	0.359145	0.454462	0.331579	0.362222	0.310352	0.287022	0.379543	0.247232	0.46797	0.516078	0.175707	0.327386	0.588844	0.449682	0.376298	0.308842	0.31822	0.482434	0.41436	0.336939	0.295907	0.300019	0.453089	0.408775	0.687261	0.449638	0.312043	0.251525	1.20584	0.0627205	0.406883	0.360683	40	17.2414	ns	0.8
Cambodia	Alternating	10	A	0.28457	0.134407	0.15785	0.201221	0.205813	0.179975	0.354728	0.692116	0.436591	0.587453	0.569139	0.629919	0.347633	0.628434	0.352968	0.201221	0.578904	0.349418	0.354728	0.352968	0.648919	0.390662	0.490358	0.235458	0.381789	0.724225	0.226011	0.312729	0.37769	0.54795	0.142272	0.397862	0.354728	36.6667	27.5862	ns	0.83871
Cambodia	Alternating	1	B	0.511685	0.484324	0.355657	0.408632	0.368349	0.361092	0.343858	0.337862	0.337457	0.228831	0.527864	0.315025	0.346061	0.495924	0.220601	0.343234	0.268303	0.390861	0.357567	0.279672	0.455878	0.308024	0.309853	0.430938	0.237841	0.528856	0.439306	0.503287	0.360007	0.254682	0.0631729	0.370384	0.356612	33.3333	20.6897	ns	0.711207
Cambodia	Alternating	8	B	0.619955	0.458854	0.95529	0.631404	0.499792	1.22525	0.530622	0.304655	0.374376	0.452016	0.674339	0.545098	0.399335	0.474865	0.549085	0.593255	0.554164	0.250832	0.466261	0.159809	0.647958	0.714703	0.389863	0.449252	1.03329	0.54795	0.60108	0.468925	0.560872	0.400115	0.0872266	0.551109	0.53786	80	6.89655	<0.0001	0.7
Cambodia	Alternating	9	B	0.75342	0.385695	0.422272	0.344139	0.668892	0.388359	0.525094	0.529742	0.40495	0.558819	0.530953	0.290329	0.548979	0.389114	0.60279	0.469006	0.56811	0.429809	0.237598	0.356531	0.652806	0.494863	0.519728	0.224626	0.576652	1.08118	0.667669	0.551668	0.305996	0.523272	0.107889	0.500102	0.5215	70	10.3448	ns	0.833333
Cambodia	Alternating	10	B	0.37769	0.603145	0.470915	0.415389	0.43588	0.449944	0.317671	0.473555	0.389863	0.176481	0.400115	0.359957	0.664568	0.425029	0.418378	0.352968	0.328278	0.607263	0.380154	0.291065	0.698836	0.411627	0.402442	0.43588	0.482028	0.509052	0.268808	0.399335	0.641681	0.406292	0.0554794	0.433143	0.413508	63.3333	10.3448	ns	0.8
Cambodia	Alternating	1	C	0.459616	0.306758	0.299563	0.43238	0.232962	0.430171	0.455491	0.466136	0.235208	0.29026	0.333569	0.279391	0.35615	0.308842	0.356531	0.462405	0.396252	0.315025	0.401718	0.360655	0.364524	0.205907	0.41134	0.451367	0.349917	0.449944	0.238902	0.342667	0.481261	0.310352	0.0614289	0.359509	0.356341	36.6667	24.1379	ns	0.702222
Cambodia	Alternating	8	C	0.312729	0.328278	0.390662	0.499792	0.28457	0.308717	0.279041	0.181697	0.484605	0.299501	1.18046	0.245809	0.505371	0.51453	0.371032	0.190077	0.174709	0.52472	0.60931	0.424293	0.275672	0.354728	0.814886	0.339472	0.403216	0.495412	0.399335	0.299501	0.700614	0.247076	0.101506	0.41466	0.36288	40	34.4828	ns	0.780247
Cambodia	Alternating	9	C	0.276377	0.280782	0.336015	0.321202	0.200541	0.3863	0.243345	0.846059	0.31198	0.224626	0.211136	0.262731	0.33838	0.282717	0.333569	0.537186	0.33838	0.195331	0.224626	0.360169	0.174709	0.35615	0.293261	0.192217	0.591053	0.200541	0.308212	0.180087	0.228831	0.549229	0.0633632	0.319525	0.287989	13.3333	51.7241	ns	0.875
Cambodia	Alternating	10	C	0.249584	0.245809	0.468925	0.245809	0.176481	0.254526	0.380972	0.226011	0.312729	0.357348	0.301573	0.230104	0.381789	0.479433	0.250832	0.390662	0.28457	0.256966	0.315699	0.174709	0.194932	0.380972	0.324459	0.205813	0.265314	0.570231	0.250832	0.464252	0.279041	0.256966	0.044844	0.305911	0.272178	13.3333	55.1724	0.018	0.75
Laos		0	NA	0.505408	0.524127	0.287022	0.549085	0.567804	0.399335	0.455491	0.255824	0.368137	0.542846	0.461731	0.555325	0.524127	0.499168	0.430533	0.31198	0.405574	0.492929	0.405574	0.287022	0.623961	0.380616	0.511648	0.555325	0.648919	0.343178	0.461731	0.461731	0.667638	0.642679	0.0748753	0.470882	0.47733	73.3333	10.3448		0.81705
Laos	MDM	1	A	0.195331	0.276945	0.224975	0.221132	0.179651	0.317733	0.25651	0.235208	0.270325	0.346959	0.425029	0.419308	0.222186	0.426533	0.293261	0.28905	0.343858	0.315025	0.366227	0.315025	0.663164	0.32572	0.326675	0.218386	0.48629	0.712001	0.206756	0.139524	0.263249	0.207791	0.0675749	0.316328	0.291156	20	51.7241	<0.0001	0.963725
Laos	MDM	4	A	0.439306	0.438906	0.282991	0.445945	0.400601	0.620616	0.420281	0.436816	0.35615	0.493284	0.692035	0.40744	0.44542	0.488324	0.361735	0.461987	0.540868	0.22271	0.370402	0.195331	0.783638	0.362222	0.242783	0.46379	0.470622	0.648707	0.463621	0.404613	0.534896	0.603214	0.0614414	0.449975	0.442363	73.3333	13.7931	ns	1.10641
Laos	MDM	7	A	0.355165	0.2362	0.229087	0.177361	0.21297	0.186146	0.372292	0.207417	0.269464	0.336939	0.45176	0.175707	0.238821	0.226011	0.187294	0.338205	0.290859	0.238902	0.400115	0.175707	0.6792	0.548979	0.199667	0.252841	0.27546	0.245572	0.418796	0.315025	0.157481	0.485928	0.0644395	0.296179	0.249207	20	65.5172	<0.0001	1.31922
Laos	MDM	10	A	0.225406	0.293723	0.251138	0.329464	0.204391	0.276377	0.331579	0.16271	0.21224	0.315025	0.288108	0.193528	0.120505	0.235208	0.211136	0.290329	0.312979	0.347296	0.178783	0.230104	0.193428	0.226092	0.205246	0.245572	0.260647	0.247232	0.295115	0.264871	0.247232	0.299563	0.0424137	0.249834	0.247232	0	82.7586	<0.0001	1.19067
Laos	MDM	1	B	0.673328	0.207791	0.384435	0.477236	0.458174	0.287633	0.512259	0.358328	0.269464	0.42365	0.6302	0.645581	0.342043	0.468638	0.342667	0.392895	0.242303	0.225406	0.410348	0.238902	0.228919	0.402542	0.461987	0.203723	0.199667	0.207698	0.760028	0.266774	0.361092	0.260048	0.105602	0.378125	0.35971	40	41.3793	0.007	0.884632
Laos	MDM	4	B	0.648919	0.622245	0.315025	0.32572	0.315518	0.458854	0.445508	0.227128	0.398748	0.494464	0.462324	0.55057	0.6418	0.46379	0.512103	0.49067	0.402442	0.408825	0.355714	0.393095	0.352138	0.493678	0.487326	0.390762	0.437172	0.306758	0.308842	0.576209	0.433415	0.352968	0.0679899	0.435758	0.435294	60	3.44828	ns	1
Laos	MDM	7	B	0.438906	0.193528	0.252841	0.157974	0.356531	0.380616	0.234877	0.211136	0.393295	0.235208	0.229087	0.247076	0.258551	0.480088	0.462111	0.161993	0.317977	0.505408	0.269464	0.517737	0.655277	0.300537	0.470004	0.204391	0.339297	0.243345	0.530953	0.224626	0.264796	0.287633	0.0707852	0.327509	0.278548	26.6667	55.1724	<0.0001	1.2189
Laos	MDM	10	B	0.309853	0.218386	0.137415	0.112313	0.235208	0.223671	0.308842	0.218386	0.299563	0.265314	0.323979	0.26801	0.28457	0.241011	0.142288	0.238821	0.410585	0.287633	0.157974	0.276377	0.29386	0.157974	0.11723	0.290329	0.376916	0.364524	0.380616	0.218386	0.247232	0.301186	0.0430907	0.256948	0.266662	3.33333	75.8621	<0.0001	1.04352
Laos	MDM	1	C	0.28573	0.265458	0.315518	0.268378	0.234216	0.329464	0.0908487	0.314776	0.356531	0.390861	0.282167	0.158835	0.444066	0.603052	0.229087	0.384435	0.228919	0.248492	0.720125	0.27624	0.627074	0.655901	0.265676	0.201221	0.314776	0.247232	0.218386	0.195331	0.238821	0.28905	0.0501883	0.322689	0.279204	16.6667	58.6207	<0.0001	0.919341
Laos	MDM	4	C	0.367026	0.625489	0.273975	0.315518	0.360007	0.373178	0.352138	0.400115	0.402442	0.378357	0.476219	0.301379	0.430714	0.430533	0.372972	0.344595	0.310352	0.410348	0.290061	0.451367	0.718235	0.480487	0.518486	0.387311	0.53577	0.526498	0.455878	0.362758	0.34369	0.474865	0.0538384	0.415692	0.393713	50	6.89655	ns	0.949484
Laos	MDM	7	C	0.726209	0.244624	0.53479	0.475196	0.32952	0.530366	0.244062	0.339759	0.437883	0.63858	0.396839	0.426533	0.315025	0.463621	0.410491	0.450506	0.394873	0.323617	0.290061	0.312979	0.343858	0.360655	0.319624	0.243345	0.32572	0.340845	0.513507	0.379543	0.477199	0.391654	0.065441	0.399383	0.385598	40	13.7931	ns	1.00337
Laos	MDM	10	C	0.369403	0.428174	0.47781	0.310352	0.251219	0.450506	0.352968	0.314033	0.207791	0.369403	0.410348	0.397475	0.541804	0.40495	0.182664	0.294322	0.281887	0.288444	0.41134	0.281887	0.290329	0.530953	0.370402	0.36516	0.418054	0.265314	0.200928	0.234877	0.318463	0.312043	0.0654971	0.344443	0.335716	30	37.931	<0.0001	1.04352
Laos		0	NA	0.505408	0.524127	0.287022	0.549085	0.567804	0.399335	0.455491	0.255824	0.368137	0.542846	0.461731	0.555325	0.524127	0.499168	0.430533	0.31198	0.405574	0.492929	0.405574	0.287022	0.623961	0.380616	0.511648	0.555325	0.648919	0.343178	0.461731	0.461731	0.667638	0.642679	0.0748753	0.470882	0.47733	73.3333	10.3448		0.81705
Laos	C6/36	4	A	0.468925	0.352968	0.60108	0.214699	0.528856	0.274543	0.236774	0.159809	0.179975	0.70593	0.390662	0.58052	0.328278	0.275672	0.37769	0.245809	0.328278	0.425029	0.381789	0.268808	0.611862	0.424293	0.328278	0.473555	0.458854	0.247076	0.593255	0.363401	0.75083	0.301573	0.100058	0.395969	0.370545	40	31.0345	ns	0.812376
Laos	C6/36	7	A	0.458854	0.402442	0.205813	0.339472	0.37769	0.328278	0.402442	0.570231	0.201221	0.324459	0.545098	0.492255	0.224626	0.249584	0.400115	0.223234	0.300537	0.124792	0.124792	0.249584	0.650834	0.569139	0.479433	0.312729	0.299501	0.32542	0.501658	0.80836	0.124792	0.304655	0.102919	0.364068	0.326849	40	34.4828	0.004	0.687294
Laos	C6/36	10	A	0.449944	0.424293	0.357348	0.308717	0.328278	0.279041	0.449944	0.474865	0.352968	0.371032	0.491625	0.476831	0.332989	0.403216	0.403216	0.424293	0.426489	0.547382	0.334855	0.37769	0.529449	0.402442	0.817557	0.441558	0.32542	0.424293	0.374376	0.625458	0.32542	0.491625	0.0609485	0.425754	0.413754	60	3.44828	ns	0.714113
Laos	C6/36	1	B	0.578904	0.37769	0.466261	0.347633	0.35031	0.381789	0.413137	0.415389	0.151816	0.374376	0.374376	0.211778	0.51453	0.308717	0.332989	0.304655	0.299501	0.424293	0.460208	0.363401	0.279041	0.324459	0.346735	0.315699	0.324459	0.223234	0.224626	0.299501	0.363401	0.549653	0.0468938	0.356752	0.348972	26.6667	24.1379	0.002	0.70948
Laos	C6/36	4	B	0.449944	0.375206	0.484605	0.690319	0.411627	0.389863	0.442263	0.513925	0.526498	0.61744	0.460208	0.582661	0.424293	0.245809	0.291065	0.35031	0.275672	0.335778	0.324459	0.499792	0.352968	0.347633	0.352968	0.371032	0.452016	0.35031	0.607263	0.636315	0.260572	0.476831	0.0689882	0.429988	0.41796	53.3333	13.7931	ns	0.707087
Laos	C6/36	7	B	0.558089	0.269969	0.6867	0.319624	0.319624	0.739125	0.765618	0.458854	0.300537	0.357348	0.424293	0.429403	0.399335	0.347633	0.176481	0.363401	0.526498	0.181697	0.554164	0.254526	0.381789	0.464252	0.42722	0.436591	0.300537	0.226011	0.442263	0.584264	0.381789	0.720344	0.101734	0.426599	0.411814	50	17.2414	ns	0.76456
Laos	C6/36	1	C	0.490358	0.308717	0.774915	0.458174	0.403216	0.174709	0.279041	0.52472	0.538777	0.347633	0.425029	0.199667	0.315699	0.303632	0.303632	0.449252	0.260572	0.604181	0.124792	0.303632	0.460208	0.636315	0.402442	0.436591	0.357348	0.409349	0.413137	0.466261	0.444372	0.43588	0.0873295	0.401742	0.411243	60	17.2414	ns	0.733146
Laos	C6/36	4	C	0.425029	0.458854	0.415389	0.363401	0.49729	0.214699	0.444372	0.269969	0.37769	0.357348	0.446469	0.504753	0.201221	0.460208	0.582124	0.492255	0.312729	0.346735	0.411627	0.354728	0.631897	0.402442	0.303632	0.458854	0.380154	0.250832	0.444372	0.449252	0.37769	0.495412	0.0531334	0.404381	0.413508	56.6667	13.7931	ns	0.836448
Laos	C6/36	7	C	0.650834	0.190077	0.466261	0.43588	0.249584	0.352968	0.299501	0.235458	0.660812	0.458174	0.685333	0.593255	0.35031	0.402442	0.533549	0.230104	0.388259	0.354728	0.230104	0.102904	0.368505	0.274543	0.505371	0.151816	0.403216	0.223234	0.250832	0.226011	0.265314	0.224626	0.115401	0.3588	0.351639	36.6667	48.2759	0.002	0.727098
Laos		0	NA	0.505408	0.524127	0.287022	0.549085	0.567804	0.399335	0.455491	0.255824	0.368137	0.542846	0.461731	0.555325	0.524127	0.499168	0.430533	0.31198	0.405574	0.492929	0.405574	0.287022	0.623961	0.380616	0.511648	0.555325	0.648919	0.343178	0.461731	0.461731	0.667638	0.642679	0.0748753	0.470882	0.47733	73.3333	10.3448		0.81705
Laos	Alternating	1	A	0.272908	0.295907	0.379025	0.244062	0.226011	0.219809	0.181916	0.469923	0.260647	0.279672	0.247232	0.268378	0.313353	0.273476	0.342043	0.200928	0.282373	0.420331	0.265676	0.279391	0.247232	0.420331	0.282167	0.247232	0.287022	0.199667	0.315025	0.237598	0.219809	0.293723	0.0275447	0.282429	0.273192	10	75.8621	<0.0001	1.04033
Laos	Alternating	4	A	0.27546	0.346061	0.332633	0.158835	0.276945	0.55248	0.229087	0.254682	0.238821	0.254682	0.640982	0.201221	0.463291	0.390662	0.343234	0.157974	0.260647	0.355714	0.31198	0.37769	0.451542	0.219809	0.238821	0.279672	0.292993	0.290329	0.228831	0.258551	0.564747	0.288108	0.0549304	0.317883	0.28389	16.6667	58.6207	<0.0001	1.03247
Laos	Alternating	7	A	0.294322	0.578942	0.163309	0.304717	0.201221	0.387055	0.38245	0.225406	0.275672	0.297673	0.285119	0.262063	0.244062	0.329464	0.283815	0.285119	0.273476	0.218386	0.420331	0.235208	0.251138	0.348806	0.619262	0.287022	0.305996	0.372292	0.337457	0.250283	0.273476	0.312979	0.0388977	0.310217	0.28607	10	58.6207	<0.0001	1.03911
Laos	Alternating	10	A	0.375206	0.192217	0.333569	0.287633	0.300019	0.219185	0.288444	0.29386	0.40744	0.362222	0.277993	0.187706	0.229087	0.22271	0.28905	0.180087	0.203723	0.318157	0.318157	0.413137	0.861877	0.22271	0.234877	0.318157	0.420655	0.319443	0.274118	0.205813	0.419358	0.226092	0.0643459	0.306757	0.288747	16.6667	58.6207	<0.0001	1.04256
Laos	Alternating	1	B	0.340845	0.243345	0.342043	0.313353	0.228919	0.244062	0.244624	0.265314	0.219809	0.315025	0.287022	0.235208	0.315025	0.31198	0.254682	0.644164	0.33838	0.290329	0.219809	0.265314	0.260722	0.257945	0.187188	0.268958	0.684085	0.228831	0.506026	0.384435	0.235208	0.319749	0.0415745	0.308413	0.267136	10	62.069	<0.0001	1.1163
Laos	Alternating	4	B	0.268303	0.31822	0.730034	0.31198	0.299501	0.268303	0.355657	0.305741	0.561564	0.274543	0.449252	0.336939	0.804909	0.336939	0.424293	0.374376	0.249584	0.237105	0.268303	0.31822	0.343178	0.31198	0.343178	0.305741	0.330699	0.355657	0.274543	0.31822	0.299501	0.237105	0.0374376	0.353786	0.31822	16.6667	31.0345	0.0002	1
Laos	Alternating	7	B	0.192217	0.379025	0.282373	0.362222	0.207698	0.234877	0.308212	0.27546	0.300019	0.264796	0.242783	0.308212	0.195331	0.237105	0.241011	0.309977	0.290859	0.243345	0.334443	0.287633	0.224626	0.25832	0.263249	0.343858	0.290061	0.339759	0.315761	0.266556	0.228831	0.378925	0.0364892	0.280251	0.278917	0	62.069	<0.0001	1
Laos	Alternating	10	B	0.270905	0.13812	0.411483	0.509245	0.401718	0.228919	0.273476	0.290329	0.374014	0.308212	0.281406	0.342043	0.238821	0.198981	0.247076	0.31198	0.241011	0.399772	0.182664	0.312043	0.291065	0.288108	0.161993	0.200541	0.227128	0.263249	0.228919	0.31198	0.266774	0.27546	0.0375437	0.282581	0.274468	10	65.5172	<0.0001	1.04204
Laos	Alternating	1	C	0.374014	0.265676	0.271835	0.290329	0.175707	0.702617	0.312043	0.27624	0.174709	0.352138	0.269464	0.224626	0.633651	0.712657	0.543669	0.282167	0.287022	0.798694	0.337862	0.569308	0.27624	0.247232	0.576209	0.344595	0.187706	0.46764	0.224626	0.219809	0.244062	0.287633	0.0627018	0.364339	0.287328	26.6667	58.6207	0.0007	1.12293
Laos	Alternating	4	C	0.436772	0.274543	0.230865	0.361897	0.324459	0.255824	0.305741	0.31822	0.355657	0.293261	0.499168	0.212147	0.274543	0.262063	0.268303	0.561564	0.361897	0.274543	0.280782	0.443012	0.31822	0.418054	0.386856	0.449252	0.31822	0.255824	0.149751	0.305741	0.386856	0.199667	0.0499168	0.326123	0.31198	20	44.8276	<0.0001	0.935056
Laos	Alternating	7	C	0.228831	0.399528	0.294322	0.210487	0.181916	0.362758	0.273476	0.262138	0.394873	0.296494	0.315025	0.46797	0.310352	0.17348	0.23313	0.320173	0.226092	0.247232	0.265314	0.32952	0.699198	0.257265	0.253378	0.348076	0.294322	0.369403	0.314033	0.293261	0.40495	0.355165	0.0504223	0.312739	0.295408	10	51.7241	<0.0001	1.04033
Laos	Alternating	10	C	0.627074	0.354778	0.35806	0.198201	0.238821	0.226011	0.360655	0.185304	0.180087	0.180949	0.265314	0.279391	0.419358	0.432879	0.170422	0.381078	0.28905	0.307263	0.424293	0.293723	0.308212	0.341356	0.380616	0.271192	0.244624	0.207791	0.273476	0.234877	0.315518	0.40495	0.0660244	0.305177	0.291386	16.6667	55.1724	<0.0001	1.04256
Laos RG		0	NA	1.16246	0.542702	0.260647	0.324996	0.312729	0.335435	0.516982	0.729048	0.215422	0.381995	0.991236	0.5252	0.453563	0.339759	0.263249	0.968586	0.429809	0.381433	0.276377	0.397475	0.850439	0.693919	0.494464	0.508328	0.48541	0.777573	0.761232	0.395123	0.636315	0.466304	0.145641	0.529274	0.475857	60	13.7931		0.89112
Laos RG	MDM	1	A	0.513925	0.709449	0.576209	0.482028	0.647958	0.535882	0.424293	0.549653	0.595352	0.714703	0.558089	0.374376	0.300537	0.249584	0.402442	0.399335	0.436591	0.765618	0.671562	0.530622	0.613896	0.51453	0.368505	0.759079	0.526498	0.352968	0.346735				0.12561	0.515571	0.526498	74.0741	3.84615	ns	0.909004
Laos RG	MDM	2	A	0.149751	0.254526	0.174709	0.124792	0.199667	0.099834	0.124792	0.224626	0.249584	0.199667	0.179975	0.181697	0.174709	0.159809	0.11162	0.230104	0.174709	0.269969	0.176481	0.235458	0.236774	0.213245	0.201221	0.205813	0.151816	0.176481	0.213245				0.031747	0.188706	0.181697	0	100	<0.0001	1.17407
Laos RG	MDM	3	A	0.179975	0.167427	0.124792	0.15785	0.159809	0.145533	0.159809	0.230104	0.201221	0.235458	0.055807	0.145533	0.124792	0.226011	0.181697	0.179975	0.230104	0.235458	0.167427	0.279041	0.124792	0.174709	0.176481	0.205813	0.224626	0.145533	0.134407				0.035703	0.176822	0.174709	0	100	<0.0001	1.15016
Laos RG	MDM	10	A	0.326675	0.203723	0.341132	0.35615	0.290329	0.463291	0.390662	0.319443	0.273476	0.314776	0.326968	0.33838	0.329464	0.279672	0.122908	0.227128	0.238821	0.331641	0.234216	0.319443	0.15599	0.287022	0.357623	0.245572	0.251138	0.182664	0.188636				0.0511555	0.285072	0.290329	3.7037	53.8462	<0.0001	1.05005
Laos RG	MDM	1	B	0.521144	0.460208	0.549653	0.569688	0.51453	0.363401	0.399335	0.538777	0.495412	0.399335	0.659395	0.616429	0.673877	0.607775	0.650834	0.589037	0.62446	0.52472	0.39463	0.490358	0.628434	0.533549	0.535882	0.502276	0.600044	0.39463	0.308717	0.424293	0.436591	0.524127	0.079486	0.517718	0.524423	80	0	ns	0.949947
Laos RG	MDM	2	B	0.235458	0.224626	0.149751	0.105892	0.174709	0.224626	0.176481	0.127263	0.28457	0.174709	0.194932	0.274543	0.151816	0.151816	0.201221	0.299501	0.223234	0.15785	0.124792	0.134407	0.28457	0.205813	0.167427	0.151816	0.301573	0.181697	0.102904	0.201221	0.124792	0.167427	0.035703	0.189381	0.175595	0	96.5517	<0.0001	1.31614
Laos RG	MDM	3	B	0.151816	0.179975	0.256966	0.247076	0.201221	0.134407	0.179975	0.149751	0.235458	0.149751	0.145533	0.141184	0.199667	0.224626	0.124792	0.099834	0.145533	0.127263	0.179975	0.159809	0.269969	0.230104	0.159809	0.201221	0.167427	0.230104	0.181697	0.199667	0.223234	0.159809	0.032333	0.181922	0.179975	0	100	<0.0001	1.23516
Laos RG	MDM	10	B	0.458174	0.258551	0.252841	0.157107	0.326968	0.26801	0.201221	0.397475	0.170422	0.287022	0.288108	0.244624	0.187188	0.359145	0.356531	0.181916	0.362222	0.315025	0.273476	0.218386	0.279391	0.268303	0.257945	0.276377	0.258551	0.220601	0.376298	0.284158	0.235208	0.269969	0.0399085	0.276374	0.269136	3.33333	75.8621	<0.0001	1.26345
Laos RG	MDM	1	C	0.799056	0.616429	0.499168	0.35031	0.363401	0.466261	0.898853	0.425029	0.375206	0.436591	0.528856	0.549653	0.611862	0.430851	0.279041	0.599002	0.526498	0.274543	0.411627	0.380972	0.455447	0.424293	0.504753	0.631897	0.402442	0.449944	0.32542	0.727657	0.335778	0.339472	0.0844095	0.480677	0.443268	70	6.89655	ns	1.05269
Laos RG	MDM	2	C	0.245809	0.28457	0.179975	0.37769	0.260572	0.141184	0.145533	0.247076	0.205813	0.201221	0.236774	0.179975	0.15785	0.211778	0.211778	0.223234	0.089988	0.199667	0.124792	0.194932	0.151816	0.223234	0.124792	0.312729	0.102904	0.28457	0.124792	0.124792	0.141184	0.049917	0.0507715	0.192031	0.1973	0	93.1034	<0.0001	1.286
Laos RG	MDM	3	C	0.299501	0.151816	0.194932	0.149751	0.151816	0.11162	0.174709	0.124792	0.201221	0.211778	0.230104	0.141184	0.167427	0.151816	0.145533	0.190077	0.201221	0.249584	0.159809	0.149751	0.226011	0.159809	0.089988	0.176481	0.15785	0.179975	0.214699	0.201221	0.201221	0.105892	0.0277095	0.17572	0.171068	0	100	<0.0001	1.31614
Laos RG	MDM	4	C	0.31198	0.242303	0.265676	0.300019	0.35806	0.344139	0.204391	0.290859	0.235208	0.314963	0.342043	0.319624	0.315518	0.265458	0.428723	0.204391	0.157107	0.228831	0.28457	0.26801	0.308212	0.32572	0.326675	0.242303	0.254682	0.227128	0.379025	0.299563	0.253378	0.244062	0.038483	0.284754	0.287714	3.33333	58.6207	<0.0001	1.21076
Laos RG		0	NA	1.16246	0.542702	0.260647	0.324996	0.312729	0.335435	0.516982	0.729048	0.215422	0.381995	0.991236	0.5252	0.453563	0.339759	0.263249	0.968586	0.429809	0.381433	0.276377	0.397475	0.850439	0.693919	0.494464	0.508328	0.48541	0.777573	0.761232	0.395123	0.636315	0.466304	0.145641	0.529274	0.475857	60	13.7931		0.89112
Laos RG	C6/36	1	A	0.268808	0.599002	0.47421	0.413137	0.368505	0.480088	0.250832	0.777324	0.292132	0.332989	0.69526	0.714703	1.22296	0.449252	0.181697	0.32542	0.482028	0.411627	0.346735	0.406292	0.468925	0.582124	0.291065	0.49729	0.426489	0.301573	0.292132	0.549085	0.39463	0.352968	0.085935	0.454976	0.412382	56.6667	17.2414	ns	0.799859
Laos RG	C6/36	4	A	0.599002	0.591677	0.425029	0.464252	0.650834	0.631404	0.474865	0.426489	0.521144	0.411627	0.848586	0.58052	0.883116	0.675724	1.01842	0.473555	0.374376	0.332989	0.554164	0.249584	0.69347	0.655127	0.560872	0.501658	0.617939	0.882411	0.607263	0.374376	0.424293	0.324459	0.107908	0.560974	0.557518	83.3333	3.44828	ns	0.801882
Laos RG	C6/36	7	A	0.292132	0.549653	0.446469	0.524127	0.324459	0.32542	0.656556	0.268808	0.352968	0.441558	0.513925	0.299501	0.418378	0.499168	0.455447	0.254526	0.249584	0.399335	0.260572	0.52472	0.275672	0.51453	0.441558	0.744578	0.455447	0.424293	0.449944	0.300537	0.458854	0.387461	0.086403	0.417006	0.432925	56.6667	20.6897	0.042	0.87088
Laos RG	C6/36	10	A	0.300537	0.28457	0.199667	0.387461	0.42722	0.300537	0.468925	0.292132	0.399335	0.460208	0.603145	0.418378	0.436591	0.466261	0.301573	0.484605	0.476831	0.474865	0.470915	0.426489	0.628434	0.460208	0.380972	0.279041	0.403216	0.399335	0.387461	0.352968	0.099834	0.631897	0.059123	0.403454	0.410797	53.3333	17.2414	0.018	0.685525
Laos RG	C6/36	1	B	1.17331	0.587453	0.470915	0.374376	0.371032	0.425029	0.319624	0.509052	0.319624	0.39463	0.718609	0.749171	0.495412	0.346735	0.359957	0.418378	0.387461	0.352968	0.603145	0.304655	0.775321	0.593255	0.501658	0.51453	0.452016	0.426489	0.424293	0.426489	0.449944	0.519354	0.0735745	0.492163	0.438217	66.6667	0	ns	0.70948
Laos RG	C6/36	4	B	0.95529	0.524127	0.430851	0.549653	1.30287	0.75249	0.436591	0.334855	0.268808	0.426489	0.639248	0.545098	0.563087	0.647958	0.476831	0.406292	0.60108	0.458174	0.504753	0.476831	0.804884	0.43588	0.563087	0.74207	0.444372	0.563087	0.775321	0.491625	0.554164	0.484605	0.094131	0.572016	0.534612	93.3333	3.44828	ns	0.80632
Laos RG	C6/36	7	B	0.466261	0.51453	0.324459	0.43588	0.317671	0.205813	0.223234	0.558089	0.700614	0.425029	0.449944	0.402442	0.347633	0.449252	0.254526	0.399335	0.279041	0.275672	0.39463	0.505371	0.357348	0.387461	0.375206	0.301573	0.249584	0.279041	0.339472	0.442263	0.211778	0.274543	0.083321	0.37159	0.366277	36.6667	31.0345	0.0017	0.864349
Laos RG	C6/36	10	B	0.51453	0.230104	0.346735	0.42722	0.375206	0.349418	0.380154	0.452016	0.28457	0.449252	0.584795	0.339472	0.537623	0.300537	0.415389	0.299501	0.174709	0.249584	0.346735	0.332989	0.399335	0.474865	0.250832	0.230104	0.279041	0.292132	0.282373	0.279041	0.39463	0.300537	0.0623965	0.352448	0.343104	26.6667	37.931	0.0003	0.714113
Laos RG	C6/36	1	C	1.07582	0.406292	0.768863	0.59952	0.526498	0.460208	0.744578	0.418378	0.655127	0.505371	0.749171	0.424293	0.499168	0.820976	0.582661	0.458854	0.681234	0.603663	0.387461	0.452016	0.623961	0.595352	0.538777	0.920423	0.52472	0.484605	0.60108	0.499168	0.335778	0.374376	0.0859725	0.57728	0.532637	90	0	ns	0.766503
Laos RG	C6/36	4	C	0.678027	0.833031	0.473555	0.359957	0.455447	0.613896	0.838615	0.591677	0.480088	0.672024	0.690319	0.775321	0.639734	0.484605	0.611862	0.390662	0.39463	0.505371	0.458854	0.533549	0.699279	0.519354	0.39463	0.521144	0.956594	0.636315	0.424293	0.636315	0.473555	0.466261	0.106011	0.573632	0.527347	86.6667	0	ns	0.8386
Laos RG	C6/36	7	C	0.444372	0.426489	0.424293	0.403216	0.473555	0.513925	0.468925	0.466261	0.505371	0.47421	0.59952	0.545098	0.460208	0.51453	0.430851	0.268808	0.381789	0.399335	0.402442	0.249584	0.52472	0.501658	0.375206	0.151816	0.223234	0.363401	0.539932	0.468925	0.201221	0.425029	0.059114	0.420931	0.437611	70	17.2414	ns	0.80632
Laos RG	C6/36	10	C	0.623961	0.226011	0.480088	0.359957	0.328278	0.352968	0.473555	0.374376	0.374376	0.79437	0.466261	0.339472	0.509052	0.230104	0.254526	0.374376	0.528856	0.265314	0.352968	0.291065	0.491625	0.521144	0.449252	0.425029	0.37769	0.449944	0.279041	0.32542	0.292132	0.374376	0.0827775	0.39952	0.374376	40	24.1379	0.014	0.685525
Laos RG		0	NA	1.16246	0.542702	0.260647	0.324996	0.312729	0.335435	0.516982	0.729048	0.215422	0.381995	0.991236	0.5252	0.453563	0.339759	0.263249	0.968586	0.429809	0.381433	0.276377	0.397475	0.850439	0.693919	0.494464	0.508328	0.48541	0.777573	0.761232	0.395123	0.636315	0.466304	0.145641	0.529274	0.475857	60	13.7931		0.89112
Laos RG	Alternating	4	A	0.675319	0.414828	0.739468	0.441209	0.277993	0.691049	0.268378	0.503056	0.424293	0.532163	0.445508	0.400115	0.508328	0.624241	0.344595	0.485972	0.371294	0.580283	0.60224	0.319624	0.358328	0.305996	0.519728	0.622369	0.252841	0.44494	0.541804	0.493678	0.391953	0.459191	0.085255	0.468026	0.45235	70	10.3448	ns	0.666373
Laos RG	Alternating	5	A	0.335753	0.718615	0.458861	0.339497	0.403203	0.199667	0.458861	0.549085	0.201227	0.352974	0.284588	0.425042	0.446444	0.473524	0.325395	0.418366	0.194925	0.275666	0.30156	0.357342	0.770903	0.458861	0.303619	0.299501	0.317658	0.268802	0.371007	0.269988	0.127288	0.300562	0.0682301	0.366959	0.337625	36.6667	31.0345	0.0006	0.61264
Laos RG	Alternating	7	A	0.963408	0.328278	0.28457	0.368505	0.426489	0.354728	0.304655	0.304655	0.268808	0.274543	0.96921	0.455447	0.51453	0.304655	0.43588	0.28457	0.449944	0.268808	0.380972	0.324459	0.446469	0.669703	0.317671	0.460208	0.179975	0.406292	0.491625	0.347633	0.349418	0.524127	0.0770465	0.415341	0.361617	43.3333	20.6897	0.028	0.673473
Laos RG	Alternating	10	A	0.236774	0.368505	0.199667	0.354728	0.179975	0.201221	0.211778	0.167427	0.236774	0.127263	0.201221	0.304655	0.291065	0.149751	0.254526	0.265314	0.213245	0.201221	0.134407	0.312729	0.265314	0.211778	0.249584	0.205813	0.223234	0.194932	0.300537	0.256966	0.214699	0.201221	0.0348045	0.231211	0.213972	0	82.7586	<0.0001	0.649631
Laos RG	Alternating	4	B	1.08657	0.960899	0.999291	0.548586	0.497995	0.349917	0.27624	0.404857	1.18036	0.784356	0.76432	0.502276	0.407871	0.318157	0.482028	0.50061	0.84327	0.47781	0.502007	0.334443	0.628066	0.401718	0.40442	0.389514	0.664948	0.556198	0.273688	0.676417	0.653611	0.273688	0.151847	0.571471	0.501308	76.6667	10.3448	ns	0.738891
Laos RG	Alternating	5	B	0.696159	0.254526	0.339472	0.324459	0.328278	0.424293	0.415389	0.299501	0.179975	0.332989	0.324459	0.390662	0.492255	0.387461	0.274543	0.279041	0.32542	0.213245	0.224626	0.32542	0.299501	0.223234	0.70593	0.303632	0.558089	0.199667	0.35031	0.194932	0.279041	0.303632	0.056459	0.341671	0.324459	20	41.3793	<0.0001	0.856999
Laos RG	Alternating	7	B	0.314776	0.313291	0.284158	0.245572	0.276945	0.204391	0.218386	0.28905	0.360006	0.32572	0.314776	0.343858	0.197315	0.31198	0.207417	0.210487	0.252841	0.11386	0.192217	0.227128	0.290329	0.245572	0.331167	0.273476	0.337862	0.315949	0.358328	0.12848	0.220514	0.268303	0.049296	0.265805	0.275211	0	65.5172	<0.0001	0.737678
Laos RG	Alternating	10	B	0.295838	0.376298	0.304973	0.142288	0.28905	0.287633	0.398748	0.187706	0.258551	0.220514	0.294054	0.284158	0.307263	0.353405	0.229599	0.21224	0.300019	0.301835	0.209657	0.12848	0.243345	0.299563	0.268378	0.199667	0.176481	0.218386	0.264796	0.13339	0.290859	0.207698	0.039531	0.256162	0.266587	0	75.8621	<0.0001	0.949947
Laos RG	Alternating	4	C	0.414878	0.49686	0.63171	0.40792	0.522973	0.41134	0.28457	0.468925	0.68562	0.372972	0.53577	0.226011	0.956594	0.611993	0.247469	0.6267	0.434539	0.387311	0.510618	0.203723	0.58326	0.572209	0.457918	0.59718	0.537186	0.537186	0.600886	0.142288	0.770535	0.446687	0.09463	0.489461	0.503739	76.6667	17.2414	ns	0.651855
Laos RG	Alternating	5	C	0.274543	0.940808	0.495425	0.214705	0.254513	0.359963	0.381801	0.199667	0.529431	0.406323	0.514518	0.223253	0.300562	0.324459	0.480075	0.380179	0.127288	0.335753	0.33488	0.265308	0.677995	0.312729	0.435899	0.449252	0.300562	0.363395	0.744572	0.111627	0.374376	0.201227	0.0906927	0.37717	0.347858	33.3333	27.5862	0.0015	0.593482
Laos RG	Alternating	7	C	0.359957	0.194932	0.223234	0.291065	0.260572	0.292132	0.223234	0.176481	0.174709	0.214699	0.303632	0.249584	0.250832	0.190077	0.247076	0.235458	0.124792	0.230104	0.213245	0.124792	0.28457	0.292132	0.174709	0.213245	0.352968	0.324459	0.145533	0.256966	0.260572	0.174709	0.0472465	0.235349	0.232781	0	89.6552	<0.0001	0.78924
Laos RG	Alternating	10	C	0.201221	0.521144	0.308717	0.194932	0.381789	0.292132	0.149751	0.28457	0.268808	0.42722	0.524127	0.224626	0.35031	0.141184	0.151816	0.455447	0.201221	0.245809	0.145533	0.213245	0.460208	0.406292	0.282373	0.269969	0.245809	0.190077	0.174709	0.205813	0.224626	0.213245	0.0533045	0.278557	0.245809	20	68.9655	<0.0001	0.904666
